# Supplementary material for: A Plasmodium Whole-Genome Synteny Map: Indels and Synteny Breakpoints as Foci for Species-Specific Genes
Source: PLOS journal article supplement (doi:10.1371/journal.ppat.0010044), 2005-12-19
Supplement: S5 (10.1371/journal.ppat.0010044.s005) [file journal.ppat.0010044.s005]

Table S5 - Pfchr3


# Table S5 - Pfchr3

| Table S5: Tiling path of RMP contigs aligned against P. falciparum chromosome 3. | | | | | |  |  |  |  |  |  |  |  |  |
|  |  |  |  |  |  |  |  |  |  |  |  |  |  |  |
| P. berghei (Pb), P. c. chabaudi (Pc) and P. y. yoelii (Py) contigs were aligned against P. falciparum (Pf) chromosome 3 and | | | | | | | | |  |  |  |  |  |  |
| combined into composite rodent malaria parasite (cRMP) contigs. The cRMP contigs were further linked by physical linkage | | | | | | | | |  |  |  |  |  |  |
| and PCR to form cRMP scaffolds. The tables also show gaps in the alignment (black lines), synteny breakpoints (violet bars), | | | | | | | | |  |  |  |  |  |  |
| cRMP telomeres (white bars), predicted centromeres (plum/black bars) and intrasyntenic P. falciparum-specific genes | | | | | | | |  |  |  |  |  |  |  |
| (grey bars, subgroups as described in Hall et al.). Contigs, physical groups or PCR groups flanking inter- or intrasyntenic regions | | | | | | | | |  |  |  |  |  |  |
| are printed in bold. Unaligned P. y. yoelii contigs grouped with 1 or more contigs aligned along this P. falciparum chromosome | | | | | | | | |  |  |  |  |  |  |
| could represent as yet unidentified cRMP-specific indels. Some of these could be pinned to the maps and the size of these | | | | | | | | |  |  |  |  |  |  |
| potential cRMP-specific indels and their gene content based on the P. y. yoelii annotation are listed in the last columns. | | | | | | | |  |  |  |  |  |  |  |
| Column headings are as follows: | |  |  |  |  |  |  |  |  |  |  |  |  |  |
|  |  |  |  |  |  |  |  |  |  |  |  |  |  |  |
| Pf chr.: P. falciparum chromosome to which the RMP contigs are aligned | | | | |  |  |  |  |  |  |  |  |  |  |
| (#: PROmer analysis� from this study; JC# and TK#: Carlton et al.; man#: manual BLAST analysis; colours refer to those used in Fig. 2 of the paper); | | | | | | | | | | |  |  |  |  |
| Pb Pc Py contig: names of the aligned RMP contigs; | | |  |  |  |  |  |  |  |  |  |  |  |  |
| Size: size (bp) of the aligned RMP contigs (regions of homology are shown for contigs interrupted by inter- or intrasyntenic regions); | | | | | | | | |  |  |  |  |  |  |
| +/-: orientation of the aligned RMP contigs; | |  |  |  |  |  |  |  |  |  |  |  |  |  |
| Start contig & End contig: estimated start & end coordinates of alignment of the RMP contigs | | | | | |  |  |  |  |  |  |  |  |  |
| based on the coordinates of PROmer hits and the size and orientation of contigs, inter- and intrasyntenic regions; | | | | | | | |  |  |  |  |  |  |  |
| cRMP contig size: size of cRMP contigs based on the corrected coordinates of alignment; | | | | | |  |  |  |  |  |  |  |  |  |
| Gap size to next cRMP contig: size of gaps (or indels) between neighbouring cRMP contigs; | | | | | |  |  |  |  |  |  |  |  |  |
| Start cRMP contig & End cRMP contig: estimated start & end coordinates of alignment of the cRMP contigs (or indels); | | | | | | | | |  |  |  |  |  |  |
| Phys. group (Py): physical linkage of neighbouring P. y. yoelii contigs; | | | | |  |  |  |  |  |  |  |  |  |  |
| PCR group (Py): neighbouring P. y. yoelii contigs were linked previously or for this study by PCR; | | | | | | |  |  |  |  |  |  |  |  |
| PCR size (Py): size of the PCR product; | |  |  |  |  |  |  |  |  |  |  |  |  |  |
| Pf gene: some P. falciparum gene names including all intra- and intersyntenic genes and genes flanking breakpoints in synteny or subtelomere linked ends; | | | | | | | | | | |  |  |  |  |
| RMP gene: orthologues of the above-mentioned P. falciparum genes. | | | | |  |  |  |  |  |  |  |  |  |  |
|  |  |  |  |  |  |  |  |  |  |  |  |  |  |  |
| Pf chr. | Pb Pc Py contig | Size | +/- | Start contig | End contig | cRMP contig size | Gap size to next cRMP contig | Start cRMP contig | End cRMP contig | Phys. group (Py) | PCR group (Py) | PCR size (Py) | Pf gene | RMP gene |
| Telomere | |  |  |  |  |  |  |  |  |  |  |  |  |  |
| 4 | Pb.c002006981.Contig1 | 829 | - | 103220 | 104049 |  |  | 103220 |  |  |  |  |  |  |
| 4 | MALPY02702 | 3435 | + | 103362 | 106752 |  |  |  |  |  | 108 |  | PFC0100c | PY07385 |
| 4 | PcContig691 | 2028 | + | 103693 | 105698 |  |  |  |  |  |  |  |  |  |
| 4 | Pb.c002006982.Contig1 | 3224 | - | 103982 | 107152 | 3932 | 138 |  | 107152 |  |  |  |  |  |
| man4 | MALPY02247 | 2766 | - | 107290 | 110056 |  |  | 107290 |  | 682 |  |  |  |  |
| 4 | Pb.c000101320.Contig1 | 5173 | + | 109898 | 115077 |  |  |  |  |  |  |  |  |  |
| 4 | MALPY02246 | 6364 | - | 110048 | 116375 |  |  |  |  | 682 | 108 | 3000 | PFC0105w | PY06573 |
| 4 | Pc.c001707790.Contig1 | 601 | + | 110334 | 110947 |  |  |  |  |  |  |  |  |  |
| 4 | Pc.c000703421.Contig1 | 2521 | - | 110580 | 113101 | 9085 | 21236 |  | 116375 |  |  |  |  |  |
| Insert |  |  |  |  |  |  | 21201 | 116138 | 137339 |  |  |  | PFC0110w --- PFC0120w |  |
| 4 | MALPY03151 | 1907 | - | 137611 | 139527 | 1916 | 168 | 137611 | 139527 |  | 108 | 250 |  |  |
| 4 | MALPY01188 | 9484 | + | 139695 | 148057 |  |  | 139695 |  |  | 108 | 250 | PFC0125w | PFC0125w |
| 4 | Pb.c001802868.Contig1 | 3933 | + | 141493 | 144959 |  |  |  |  |  |  |  |  |  |
| 4 | Pc.c000603004.Contig1 | 3278 | + | 144386 | 147631 |  |  |  |  |  |  |  |  |  |
| 4 | Pb.c001502049.Contig2 | 7245 | + | 144768 | 151010 |  |  |  |  |  |  |  |  |  |
| 4 | MALPY00432 | 3133 | + | 147696 | 150851 |  |  |  |  | 21A | 108 | 1500 |  |  |
| 4 | Pc.c000202906.Contig1 | 8655 | + | 149728 | 159187 |  |  |  |  |  |  |  |  |  |
| 4 | MALPY01813 | 7548 | + | 151039 | 158996 |  |  |  |  | 21A | 108 | 400 |  |  |
| 4 | Pb.c002007892.Contig1 | 1408 | + | 152314 | 153722 |  |  |  |  |  |  |  |  |  |
| 4 | Pb.c001402117.Contig1 | 4885 | + | 154439 | 159342 | 19647 | 16 |  | 159342 |  |  |  |  |  |
| 4 | Pc.c000202178.Contig2 | 2249 | + | 159358 | 161607 | 2249 | 277 | 159358 | 161607 |  |  |  |  |  |
| 4 | MALPY01598 | 4937 | - | 161884 | 165012 |  |  | 161884 |  | 21A |  |  |  |  |
| 4 | Pc.c001707813.Contig1 | 3293 | + | 164421 | 167687 |  |  |  |  |  |  |  |  |  |
| 4 | MALPY00355 | 8485 | + | 164916 | 173419 |  |  |  |  | 696 | 108 | 6500 |  |  |
| 4 | Pb.c001101917.Contig1 | 2195 | + | 165934 | 168123 |  |  |  |  |  |  |  |  |  |
| 4 | Pb.c001101919.Contig1 | 2922 | + | 168466 | 171182 |  |  |  |  |  |  |  |  |  |
| 4 | MALPY03565 | 173 | - | 168513 | 168689 |  |  |  |  |  | 324 |  |  |  |
| 4 | Pc.c000402872.Contig1 | 1688 | + | 169172 | 170851 |  |  |  |  |  |  |  |  |  |
| 4 | PcContig559 | 2552 | + | 171053 | 173608 | 11724 | 194 |  | 173608 |  |  |  |  |  |
| 4 | MALPY02504 | 5620 | - | 173802 | 179245 |  |  | 173802 |  | 696 | 324 | 3000 |  |  |
| 4 | Pc.c000903426.Contig1 | 3180 | - | 174296 | 177404 |  |  |  |  |  |  |  |  |  |
| 4 | Pb.c001702858.Contig1 | 2601 | - | 175474 | 178102 | 5443 | 2377 |  | 179245 |  |  |  |  |  |
| 4 | MALPY00141 | 15312 | + | 181622 | 199030 |  |  | 181622 |  | 1146 | 324 | 2000 |  |  |
| 4 | PbContig307 | 7678 | + | 182667 | 191150 |  |  |  |  |  |  |  |  |  |
| 4 | Pc.c001204461.Contig1 | 881 | - | 183016 | 183864 |  |  |  |  |  |  |  |  |  |
| 4 | Pc.c000203338.Contig1 | 5941 | - | 184491 | 190774 |  |  |  |  |  |  |  |  |  |
| 4 | Pb.c001702905.Contig1 | 5540 | + | 191878 | 198316 |  |  |  |  |  |  |  |  |  |
| 4 | Pc.c000903691.Contig1 | 3363 | - | 196105 | 199486 | 17864 | 116 |  | 199486 |  |  |  |  |  |
| 4 | MALPY01025 | 11810 | + | 199602 | 210927 |  |  | 199602 |  | 1146 | 324 | 650 | PFC0191c | n.a. |
| 4 | PbContig84 | 6609 | - | 199979 | 206142 |  |  |  |  |  |  |  |  |  |
| 4 | Pc.c000903487.Contig1 | 3069 | - | 200622 | 203700 |  |  |  |  |  |  |  |  |  |
| 4 | Pc.c000302864.Contig1 | 1344 | - | 203298 | 204642 |  |  |  |  |  |  |  |  |  |
| 4 | MALPY03183 | 532 | - | 203605 | 204137 |  |  |  |  |  |  |  |  |  |
| 4 | Pc.c000403275.Contig1 | 811 | - | 204838 | 205649 |  |  |  |  |  |  |  |  |  |
| man4 | PbContig24A | 1 - 10824 | + | 207315 | 219190 |  |  |  |  |  |  |  | PFC0210c | PB001026.00.0 |
| 4 | MALPY00900 | 3737 | - | 214191 | 218003 |  |  |  |  | 106 |  |  |  |  |
| 4 | PcContig443 | 2691 | - | 215572 | 218254 | 19588 | 4541 |  | 219190 |  |  |  |  |  |
| Insert |  |  |  |  |  |  | 1856 | 220611 | 222467 |  |  |  | PFC0215c |  |
| man4 | MALPY02692 | 2363 | + | in intrasyntenic gap (219190-223731) | | | |  |  | 106 |  |  |  |  |
| TK4 | MALPY01163 | 2148 | - | 223731 | 224571 |  |  | 223731 |  |  |  |  |  |  |
| man4 | PbContig24B | 13744 - 15723 | + | 223731 | 225515 | 1784 | 873 |  | 225515 |  |  |  | PFC0220w | part n.a. - PB101790.00.0 |
| 4 | MALPY02340 | 2122 | - | 226388 | 236078 |  |  | 226388 |  | 174 |  |  |  |  |
| 4 | Pc.c000002546.Contig1 | 3615 | + | 229184 | 232826 |  |  |  |  |  |  |  |  |  |
| 4 | MALPY02742 | 4286 | + | 229408 | 233721 |  |  |  |  | 174 |  |  |  |  |
| 4 | PbContig38 | 3238 | + | 230424 | 233688 |  |  |  |  |  |  |  |  |  |
| 4 | PcContig200 | 3495 | + | 233444 | 236954 |  |  |  |  |  |  |  |  |  |
| 4 | Pb.c001702919.Contig1 | 2851 | - | 234335 | 237219 |  |  |  |  |  |  |  |  |  |
| 4 | MALPY02448 | 2883 | + | 236372 | 239261 | 12873 | 779 |  | 239261 | 174 | 131 |  |  |  |
| TK4 | MALPY02698 | 2214 | - | 240040 | 241873 |  |  | 240040 |  | 174 |  |  |  |  |
| man4 | MALPY01414 | 3597 | - | 241512 | 245109 | 5069 | 2134 |  | 245109 | 174 |  |  |  |  |
| 4 | MALPY01578 | 6891 | - | 247243 | 254140 |  |  | 247243 |  |  | 131 | 8000 |  |  |
| 4 | Pb.c001001673.Contig1 | 3888 | - | 247770 | 251658 |  |  |  |  |  |  |  |  |  |
| 4 | Pc.c000903251.Contig1 | 4364 | + | 250279 | 254649 |  |  |  |  |  |  |  |  |  |
| 4 | Pb.c002112118.Contig1 | 1937 | + | 251941 | 253932 | 7406 | 44 |  | 254649 |  |  |  |  |  |
| 4 | MALPY01182 | 4773 | - | 254693 | 259184 |  |  | 254693 |  |  | 131 | 400 |  |  |
| 4 | PcContig242 | 1317 | + | 255905 | 257222 |  |  |  |  |  |  |  |  |  |
| 4 | Pb.c001101859.Contig1 | 3933 | + | 256316 | 260404 |  |  |  |  |  |  |  |  |  |
| 4 | Pc.c000803216.Contig1 | 2771 | + | 257289 | 260160 |  |  |  |  |  |  |  |  |  |
| 4 | PcContig15 | 2761 | + | 260249 | 262995 |  |  |  |  |  |  |  |  |  |
| 4 | MALPY03205 | 1604 | + | 260823 | 262386 |  |  |  |  | 166 | 131 | 2500 |  |  |
| 4 | MALPY00730 | 10399 | - | 262560 | 274553 |  |  |  |  | 166 |  |  |  |  |
| 4 | Pc.c001203969.Contig1 | 2310 | + | 263903 | 266150 |  |  |  |  |  |  |  |  |  |
| 4 | PcContig716 | 2645 | + | 266878 | 270273 |  |  |  |  |  |  |  |  |  |
| 4 | PcContig669 | 13239 | + | 271295 | 286218 |  |  |  |  |  |  |  |  |  |
| 4 | PbContig122 | 5225 | + | 271435 | 277027 |  |  |  |  |  |  |  |  |  |
| 4 | MALPY03184 | 619 | - | 273380 | 273987 |  |  |  |  |  | 221 |  |  |  |
| 4 | MALPY01936 | 7639 | + | 275424 | 284317 |  |  |  |  | 166 | 221 | 1500 | PFC0261c | n.a. |
| 4 | PbContig132 | 11583 | - | 279585 | 292502 |  |  |  |  |  |  |  |  |  |
| TK4 | MALPY02725 | 2978 | - | 284372 | 287059 |  |  |  |  | 166 |  |  |  |  |
| 4 | MALPY01678 | 7591 | - | 289395 | 297776 |  |  |  |  | 71 | 221 | 6500 |  |  |
| 4 | Pc.c000002496.Contig1 | 15177 | - | 290073 | 306005 |  |  |  |  |  |  |  |  |  |
| 4 | PbContig232 | 6031 | + | 294258 | 299894 |  |  |  |  |  |  |  |  |  |
| 4 | MALPY00314 | 3165 | + | 297597 | 300343 |  |  |  |  | 71 | 221 | 225 |  |  |
| 4 | MALPY02390 | 6368 | - | 300516 | 306884 |  |  |  |  | 203 | 221 | 800 |  |  |
| 4 | Pb.c000401506.Contig1 | 5503 | + | 301174 | 306679 |  |  |  |  |  |  |  |  |  |
| 4 | PcContig20 | 11187 | - | 306412 | 318477 |  |  |  |  |  |  |  |  |  |
| 4 | MALPY01873 | 5535 | + | 306740 | 312623 |  |  |  |  | 203 |  |  |  |  |
| 4 | PbContig83 | 5480 | + | 307185 | 313231 |  |  |  |  |  |  |  |  |  |
| 4 | MALPY03501 | 395 | + | 308076 | 308471 |  |  |  |  |  | 159 |  |  |  |
| 4 | MALPY02276 | 4503 | - | 314003 | 318768 |  |  |  |  |  | 159 | 6500 |  |  |
| 4 | Pb.c000601611.Contig1 | 4274 | + | 314436 | 318946 | 64253 | 61 |  | 318946 |  |  |  |  |  |
| TK4 | MALPY02323 | 2639 | - | 319007 | 321311 | 2304 | 823 | 319007 | 321311 | 228 |  |  |  |  |
| 4 | MALPY01758 | 10035 | + | 322134 | 333264 |  |  | 322134 |  | 228 | 159 | 3000 |  |  |
| 4 | Pc.c000502960.Contig1 | 5299 | - | 323818 | 329062 |  |  |  |  |  |  |  |  |  |
| 4 | Pb.c001402175.Contig1 | 3992 | + | 324383 | 328380 |  |  |  |  |  |  |  |  |  |
| 4 | Pb.c001001802.Contig1 | 7150 | + | 329629 | 337108 |  |  |  |  |  |  |  |  |  |
| 4 | PcContig650 | 2132 | - | 333421 | 335520 |  |  |  |  |  |  |  |  |  |
| 4 | MALPY00529 | 28652 | - | 333751 | 363026 |  |  |  |  |  | 159 | 700 | PFC0355c | PY01932 |
| 4 | Pc.c000703866.Contig1 | 805 | - | 335676 | 336481 |  |  |  |  |  |  |  |  |  |
| 4 | Pb.c000701430.Contig1 | 6745 | + | 341555 | 348262 |  |  |  |  |  |  |  |  |  |
| 4 | Pc.c001103051.Contig1 | 4917 | - | 341774 | 346706 |  |  |  |  |  |  |  |  |  |
| 4 | Pb.c001803552.Contig1 | 3050 | + | 349351 | 352404 |  |  |  |  |  |  |  |  |  |
| 4 | MALPY03186 | 283 | - | 350729 | 351019 |  |  |  |  |  |  |  |  |  |
| 4 | Pb.c001502023.Contig2 | 18649 | + | 353044 | 373333 |  |  |  |  |  |  |  |  |  |
| 4 | PcContig597 | 9087 | + | 356851 | 366547 |  |  |  |  |  |  |  |  |  |
| 4 | MALPY00642 | 16088 | - | 364346 | 380907 |  |  |  |  | 289 |  |  |  |  |
| 4 | Pc.c000202768.Contig1 | 3266 | + | 367708 | 371073 |  |  |  |  |  |  |  |  |  |
| 4 | Pc.c000502385.Contig3 | 6139 | + | 371606 | 377596 |  |  |  |  |  |  |  |  |  |
| 4 | Pb.c000601239.Contig1 | 6865 | + | 373243 | 380097 |  |  |  |  |  |  |  |  |  |
| 4 | PcContig27 | 1421 | + | 377842 | 379305 |  |  |  |  |  |  |  |  |  |
| 4 | Pb.c001101505.Contig1 | 3713 | + | 380387 | 384104 |  |  |  |  |  |  |  |  |  |
| 4 | MALPY00996 | 6219 | + | 381094 | 387456 |  |  |  |  | 289 |  |  |  |  |
| 4 | Pc.c001606566.Contig1 | 721 | - | 381658 | 382379 |  |  |  |  |  |  |  |  |  |
| 4 | Pc.c000803285.Contig1 | 1411 | - | 382564 | 383975 |  |  |  |  |  |  |  |  |  |
| 4 | PbContig353 | 12653 | + | 384781 | 398430 |  |  |  |  |  |  |  |  |  |
| 4 | Pc.c000603005.Contig1 | 3543 | - | 386223 | 389754 |  |  |  |  |  |  |  |  |  |
| 4 | MALPY01185 | 11076 | - | 386442 | 398077 |  |  |  |  | 289 |  |  |  |  |
| 4 | MALPY03549 | 819 | - | 386811 | 387627 |  |  |  |  |  |  |  |  |  |
| 4 | Pc.c000102617.Contig1 | 4451 | + | 398040 | 402543 |  |  |  |  |  |  |  |  |  |
| 4 | MALPY00816 | 8272 | - | 398334 | 407227 |  |  |  |  | 289 |  |  |  |  |
| 4 | Pb.c001903694.Contig1 | 2559 | + | 398941 | 401446 |  |  |  |  |  |  |  |  |  |
| 4 | Pb.c000101083.Contig2 | 4993 | - | 400384 | 406054 |  |  |  |  |  |  |  |  |  |
| 4 | Pc.c000102490.Contig1 | 2510 | + | 403350 | 406033 | 85093 | 122 |  | 407227 |  |  |  |  |  |
| 4 | Pb.c001702753.Contig1 | 3778 | + | 407349 | 411003 |  |  | 407349 |  |  |  |  |  |  |
| 4 | MALPY02655 | 3203 | - | 407621 | 410604 |  |  |  |  | 289 | 252 |  |  |  |
| 4 | Pc.c000502397.Contig1 | 4016 | + | 408990 | 413005 |  |  |  |  |  |  |  |  |  |
| TK4 | MALPY01615 | 4886 | - | 410690 | 415624 | 8275 | 2155 |  | 415624 | 289 |  |  |  |  |
| 4 | MALPY02163 | 3896 | - | 417779 | 421776 |  |  | 417779 |  |  | 252 | 9000 |  |  |
| 4 | Pc.c001405242.Contig1 | 725 | + | 418803 | 419528 |  |  |  |  |  |  |  |  |  |
| 4 | Pb.c001502566.Contig1 | 2760 | + | 418945 | 421843 |  |  |  |  |  |  |  |  |  |
| 4 | Pc.c001405147.Contig1 | 749 | + | 420216 | 421056 | 4064 | 3756 |  | 421843 |  |  |  |  |  |
| 4 | MALPY02047 | 6027 | + | 425599 | 431647 | 6048 | 6950 | 425599 | 431647 |  |  |  |  |  |
| 4 | Pb.c001201936.Contig1 | 7299 | + | 438597 | 445893 |  |  | 438597 |  |  |  |  |  |  |
| 4 | MALPY02704 | 5862 | - | 439309 | 445397 |  |  |  |  |  |  |  |  |  |
| man4 | PcContig63A | 1 - 5915 | + | 440593 | 448058 | 9461 | 9791 |  | 448058 |  |  |  | PFC0435w | PC001356.02.0 |
| Insert |  |  |  |  |  |  | 6809 | 448971 | 455780 |  |  |  | PFC0440c |  |
| 4 | MALPY01409 | 3714 | + | 457849 | 461133 |  |  | 457849 |  |  | 42 |  |  |  |
| man4 | PcContig63B | 7069 - 7817 | + | 457849 | 458598 |  |  |  |  |  |  |  | PFC0441c | PC001356.02.0 |
| 4 | Pc.c001606000.Contig1 | 1597 | + | 458399 | 460706 |  |  |  |  |  |  |  |  |  |
| 4 | Pb.c001803533.Contig1 | 1633 | - | 460208 | 461844 | 3995 | 574 |  | 461844 |  |  |  |  |  |
| 4 | MALPY01682 | 7925 | + | 462418 | 470427 |  |  | 462418 |  | 46A | 42 | 1500 |  |  |
| 4 | PbContig89 | 15500 | + | 464547 | 482509 |  |  |  |  |  |  |  |  |  |
| TK4 | MALPY02786 | 3448 | + | 473757 | 474978 |  |  |  |  | 46A |  |  |  |  |
| 4 | MALPY02124 | 5269 | - | 475394 | 480618 |  |  |  |  | 953 | 42 | 3000 |  |  |
| 4 | Pc.c001707862.Contig1 | 1746 | - | 475833 | 477579 |  |  |  |  |  |  |  |  |  |
| 4 | Pc.c001003771.Contig1 | 1135 | + | 478895 | 480033 |  |  |  |  |  |  |  |  |  |
| man4 | MALPY01917 | 2829 | - | 480487 | 483816 |  |  |  |  | 953 |  |  |  |  |
| man4 | Pb.c001402479.Contig1 | 890 | - | 483081 | 484471 |  |  |  |  |  |  |  |  |  |
| 4 | MALPY00685 | 11762 | + | 484036 | 494477 |  |  |  |  |  | 42 | 3000 |  |  |
| 4 | Pc.c000302907.Contig1 | 2641 | + | 484595 | 487236 |  |  |  |  |  |  |  |  |  |
| 4 | Pb.c001301852.Contig1 | 2775 | - | 484943 | 487718 |  |  |  |  |  |  |  |  |  |
| 4 | Pc.c000102568.Contig1 | 5882 | + | 490866 | 496757 |  |  |  |  |  |  |  |  |  |
| 4 | MALPY00463 | 21463 | - | 495880 | 517189 |  |  |  |  | 731 | 42 | 2000 |  |  |
| 4 | Pb.c000201558.Contig1 | 4176 | - | 498442 | 502609 |  |  |  |  |  |  |  |  |  |
| 4 | Pc.c000602331.Contig3 | 3938 | + | 501142 | 505093 |  |  |  |  |  |  |  |  |  |
| 4 | PbContig276 | 3937 | - | 503151 | 506958 |  |  |  |  |  |  |  |  |  |
| 4 | Pc.c000602877.Contig1 | 3111 | + | 504764 | 508052 |  |  |  |  |  |  |  |  |  |
| 4 | MALPY03003 | 542 | + | 506115 | 506663 |  |  |  |  |  |  |  |  |  |
| 4 | Pb.c000201303.Contig2 | 3775 | - | 507180 | 510877 |  |  |  |  |  |  |  |  |  |
| 4 | Pc.c000703315.Contig1 | 2576 | + | 508300 | 510868 |  |  |  |  |  |  |  |  |  |
| 4 | PcContig36 | 7918 | + | 511642 | 521167 |  |  |  |  |  |  |  |  |  |
| 4 | Pb.c001803326.Contig1 | 1713 | - | 511690 | 513400 |  |  |  |  |  |  |  |  |  |
| 4 | Pb.c000601172.Contig1 | 9093 | - | 516493 | 525868 |  |  |  |  |  |  |  |  |  |
| 4 | MALPY00464 | 6589 | + | 518651 | 525327 |  |  |  |  | 731 | 130 |  |  |  |
| 4 | Pc.c001505046.Contig1 | 1494 | + | 525213 | 526716 |  |  |  |  |  |  |  |  |  |
| 4 | MALPY03204 | 598 | + | 525344 | 525954 |  |  |  |  |  | 130 | 900 |  |  |
| 4 | Pb.c000301156.Contig1 | 14496 | - | 525635 | 541870 |  |  |  |  |  |  |  |  |  |
| 4 | MALPY01380 | 12017 | + | 525832 | 539439 |  |  |  |  | 133 | 130 | 800 | PFC0540w | PY04508 |
| 4 | PcContig54 | 8015 | + | 526233 | 535964 |  |  |  |  |  |  |  |  |  |
| 4 | PcContig383 | 2102 | - | 535896 | 537998 |  |  |  |  |  |  |  |  |  |
| 4 | Pc.c001103704.Contig1 | 2616 | - | 538916 | 541554 |  |  |  |  |  |  |  |  |  |
| 4 | MALPY01077 | 11862 | + | 539339 | 551989 |  |  |  |  | 133 |  |  |  |  |
| 4 | PcContig14 | 2790 | + | 541858 | 544606 |  |  |  |  |  |  |  |  |  |
| 4 | PbContig210 | 10014 | - | 545006 | 555563 |  |  |  |  |  |  |  |  |  |
| 4 | Pc.c001505437.Contig1 | 1182 | - | 547286 | 548465 |  |  |  |  |  |  |  |  |  |
| 4 | Pc.c000102581.Contig1 | 6022 | - | 548812 | 555229 |  |  |  |  |  |  |  |  |  |
| 4 | MALPY00881 | 7365 | - | 552310 | 559601 | 97183 | 1715 |  | 559601 | 133 |  |  |  |  |
| TK4 | MALPY01842 | 3069 | - | 561316 | 564406 |  |  | 561316 |  | 291 |  |  |  |  |
| 4 | Pb.c000901796.Contig1 | 5195 | + | 561938 | 567139 |  |  |  |  |  |  |  |  |  |
| 4 | MALPY00798 | 4348 | + | 564037 | 568561 |  |  |  |  | 291 |  |  |  |  |
| 4 | Pc.c001707716.Contig1 | 1028 | - | 564132 | 565177 | 7245 | 4821 |  | 568561 |  |  |  |  |  |
| 4 | MALPY00628 | 14102 | + | 573382 | 587740 |  |  | 573382 |  |  |  |  | PFC0610c | PY02287 |
| 4 | Pb.c002007177.Contig1 | 2981 | - | 574800 | 577780 | 14358 | 13390 |  | 587740 |  |  |  |  |  |
| Centromere | |  |  |  |  |  |  |  |  |  |  |  |  |  |
| 4 | MALPY02636 | 3741 | + | 601130 | 605144 | 4014 | 1656 | 601130 | 605144 |  |  |  | PFC0615w | PY07280 |
| 4 | MALPY01507 | 17475 | - | 606800 | 623065 |  |  | 606800 |  |  | 179 |  | PFC0625w | n.a. (17043-17453) |
| 4 | PbContig179 | 2551 | - | 608250 | 610801 |  |  |  |  |  |  |  |  |  |
| 4 | Pb.c000701574.Contig1 | 8357 | - | 612776 | 621690 |  |  |  |  |  |  |  |  |  |
| 4 | Pc.c000202834.Contig1 | 2494 | + | 613607 | 615473 |  |  |  |  |  |  |  |  |  |
| 4 | Pc.c000602981.Contig1 | 2448 | + | 616317 | 618984 |  |  |  |  |  |  |  |  |  |
| 4 | Pc.c000003077.Contig1 | 2281 | - | 619392 | 621673 | 16265 | 1136 |  | 623065 |  |  |  |  |  |
| 4 | MALPY01913 | 8178 | - | 624201 | 632382 |  |  | 624201 |  |  | 179 | 2500 |  |  |
| 4 | Pb.c000701242.Contig2 | 16188 | + | 629032 | 643691 |  |  |  |  |  |  |  |  |  |
| 4 | PcContig583 | 4836 | - | 631245 | 636078 |  |  |  |  |  |  |  |  |  |
| 4 | MALPY01960 | 7890 | - | 631459 | 638906 |  |  |  |  |  | 179 | 2000 |  |  |
| 4 | MALPY00997 | 9351 | - | 641254 | 650605 |  |  |  |  | 359 | 179 | 1200 |  |  |
| 4 | PcContig628 | 4607 | - | 642129 | 647104 |  |  |  |  |  |  |  |  |  |
| 4 | Pb.c001201650.Contig2 | 5417 | + | 644967 | 650384 | 26404 | 1178 |  | 650605 |  |  |  |  |  |
| TK4 | MALPY01866 | 4123 | + | 651783 | 655634 |  |  | 651783 |  | 359 |  |  |  |  |
| 4 | Pb.c000201625.Contig1 | 3789 | - | 655196 | 659444 |  |  |  |  |  |  |  |  |  |
| 4 | MALPY03232 | 1384 | + | 656340 | 657896 |  |  |  |  | 825 | 179 | 4000 |  |  |
| 4 | Pc.c001203218.Contig1 | 3230 | + | 656614 | 660436 |  |  |  |  |  |  |  |  |  |
| 4 | MALPY01044 | 5169 | + | 656918 | 662543 |  |  |  |  | 825 |  |  |  |  |
| 4 | Pb.c000801836.Contig1 | 7865 | + | 660184 | 668440 |  |  |  |  |  |  |  |  |  |
| 4 | MALPY02160 | 6227 | + | 663235 | 669852 |  |  |  |  |  | 132 |  |  |  |
| 4 | PcContig758 | 2392 | + | 664228 | 666886 | 18069 | 636 |  | 669852 |  |  |  |  |  |
| 4 | Pc.c001811919.Contig1 | 2900 | - | 670488 | 673376 |  |  | 670488 |  |  |  |  |  |  |
| 4 | PbContig340 | 1 - 4633 | + | 670651 | 675218 |  |  |  |  |  |  |  |  |  |
| 4 | MALPY03062 | 956 | + | 671353 | 672309 |  |  |  |  |  | 132 | 1800 |  |  |
| 4 | MALPY01546 | 671 - 2512 | - | 673276 | 675260 | 4772 | 659 |  | 675260 |  |  |  | PFC0735w | PY04951 |
| BREAKPOINT | |  |  |  |  |  |  |  |  |  |  |  |  |  |
| 8 | MALPY01621A | 1 - 2645 | - | 675919 | 678711 |  |  | 675919 |  |  | 166 |  | PFC0740w | PY05143 |
| 8 | PcContig478 | 1 - 1425 | - | 675919 | 677560 |  |  |  |  |  |  |  |  |  |
| 8 | Pc.c001003292.Contig1 | 2587 | - | 677604 | 680222 |  |  |  |  |  |  |  |  |  |
| 8 | Pb.c000701183.Contig1 | 4357 | - | 678429 | 682813 |  |  |  |  |  |  |  |  |  |
| 8 | MALPY00041 | 11604 | + | 678639 | 690535 |  |  |  |  |  | 166 | 800 |  |  |
| 8 | Pb.c001702308.Contig1 | 4457 | - | 683312 | 687772 |  |  |  |  |  |  |  |  |  |
| 8 | Pc.c001708919.Contig1 | 629 | + | 686518 | 687147 |  |  |  |  |  |  |  |  |  |
| 8 | MALPY03024 | 535 | + | 688302 | 688861 | 14616 | 12270 |  | 690535 |  |  |  |  |  |
| TK8 | MALPY02729 | 3396 | + | 702805 | 706996 |  |  | 702805 |  | 268 |  |  |  |  |
| 8 | PbContig141 | 5235 | + | 705265 | 710709 |  |  |  |  |  |  |  |  |  |
| 8 | MALPY02212 | 4027 | + | 707447 | 711672 |  |  |  |  | 268 |  |  |  |  |
| 8 | PcContig612 | 6039 | - | 709461 | 715590 |  |  |  |  |  |  |  |  |  |
| 8 | MALPY00759 | 5353 | + | 711984 | 717319 |  |  |  |  | 268 | 84 |  |  |  |
| 8 | PcContig26 | 4596 | - | 715948 | 720884 |  |  |  |  |  |  |  |  |  |
| 8 | MALPY03100 | 882 | - | 717406 | 718617 |  |  |  |  |  | 84 | 700 |  |  |
| 8 | MALPY02312 | 2958 | + | 720738 | 723569 |  |  |  |  |  | 84 | 2200 |  |  |
| 8 | Pb.c001904382.Contig1 | 3234 | + | 721038 | 724131 |  |  |  |  |  |  |  |  |  |
| 8 | Pc.c001505007.Contig1 | 1381 | - | 721729 | 722944 | 21326 | 837 |  | 724131 |  |  |  |  |  |
| 8 | MALPY02678 | 3351 | + | 724968 | 729075 | 4107 | 1921 | 724968 | 729075 |  | 84 | 6500 |  |  |
| 8 | MALPY00731 | 9880 | + | 730996 | 740769 |  |  | 730996 |  | 128 |  |  |  |  |
| 8 | Pb.c001202106.Contig1 | 5872 | + | 732063 | 738060 |  |  |  |  |  |  |  |  |  |
| 8 | PcContig164 | 2777 | + | 732230 | 735273 |  |  |  |  |  |  |  |  |  |
| 8 | Pc.c000003024.Contig1 | 959 | + | 736260 | 737219 |  |  |  |  |  |  |  |  |  |
| 8 | Pc.c000202803.Contig1 | 1323 | + | 740216 | 741527 |  |  |  |  |  |  |  |  |  |
| 8 | MALPY00909 | 13929 | - | 740234 | 755091 |  |  |  |  | 128 |  |  |  |  |
| 8 | Pb.c001904547.Contig1 | 977 | + | 740430 | 741401 |  |  |  |  |  |  |  |  |  |
| 8 | Pc.c000203287.Contig1 | 637 | + | 741489 | 742123 |  |  |  |  |  |  |  |  |  |
| 8 | Pb.c000401236.Contig2 | 14656 | + | 743996 | 758830 |  |  |  |  |  |  |  |  |  |
| 8 | MALPY03573 | 826 | - | 744936 | 745768 |  |  |  |  |  | 330 |  |  |  |
| 8 | MALPY03195 | 457 | + | 746705 | 747246 |  |  |  |  |  | 330 | 1200 |  |  |
| 8 | MALPY03196 | 691 | + | 746716 | 747512 |  |  |  |  |  |  |  |  |  |
| 8 | Pc.c001104196.Contig1 | 2725 | - | 747044 | 749869 |  |  |  |  |  |  |  |  |  |
| 8 | Pc.c001606026.Contig1 | 2847 | - | 752093 | 754935 |  |  |  |  |  |  |  |  |  |
| 8 | MALPY02024 | 12557 | - | 756083 | 768369 |  |  |  |  |  | 218 |  |  |  |
| 8 | Pb.c001102190.Contig1 | 1198 | + | 764191 | 765389 | 37373 | 1045 |  | 768369 |  |  |  |  |  |
| 8 | MALPY02429 | 4174 | - | 769414 | 773576 | 4162 | 159 | 769414 | 773576 |  |  |  |  |  |
| 8 | Pb.c000401231.Contig2 | 27778 | - | 773735 | 805294 |  |  | 773735 |  |  |  |  | PFC0830w | PB103830.00.0 |
| 8 | Pc.c001404767.Contig1 | 1509 | - | 774823 | 776308 |  |  |  |  |  |  |  |  |  |
| 8 | MALPY00204 | 12651 | - | 775370 | 790633 |  |  |  |  | 1141 | 218 | 4000 |  |  |
| 8 | Pc.c000302879.Contig1 | 2474 | - | 778287 | 780417 |  |  |  |  |  |  |  |  |  |
| 8 | PcContig679 | 6855 | + | 781659 | 791398 |  |  |  |  |  |  |  |  |  |
| 8 | MALPY00262B | 1 - 20898 | + | 791325 | 813222 |  |  |  |  | 1141 | 218 | 700 | PFC0865w | PY00973 |
| 8 | MALPY03579 | 467 | - | 792786 | 793248 |  |  |  |  |  | 239 |  |  |  |
| 8 | Pc.c001003943.Contig1 | 1050 | - | 793750 | 794824 |  |  |  |  |  |  |  |  |  |
| 8 | Pc.c001606039.Contig1 | 4022 | - | 795517 | 799800 |  |  |  |  |  |  |  |  |  |
| 8 | MALPY03438 | 815 | + | 796456 | 797268 |  |  |  |  |  | 239 | 2500 |  |  |
| 8 | MALPY03101 | 512 | + | 798629 | 799144 |  |  |  |  |  | 239 | 1700 |  |  |
| 8 | Pc.c000303492.Contig1 | 1017 | - | 799698 | 800721 |  |  |  |  |  |  |  |  |  |
| 8 | Pc.c001813145.Contig1 | 770 | - | 800827 | 801597 |  |  |  |  |  |  |  |  |  |
| 8 | PcContig427 | 2562 | - | 803174 | 805735 |  |  |  |  |  |  |  |  |  |
| 8 | Pb.c000101043.Contig1 | 3005 | - | 806011 | 809016 |  |  |  |  |  |  |  |  |  |
| 8 | PcContig159 | 3116 | - | 807870 | 810971 |  |  |  |  |  |  |  |  |  |
| 8 | Pc.c000903323.Contig1 | 1054 - 3068 | - | 811470 | 813222 |  |  |  |  |  |  |  |  |  |
| 8 | Pb.c001301459.Contig2B | 1 - 1608 | + | 811614 | 813210 | 39487 | 1606 |  | 813222 |  |  |  |  |  |
| BREAKPOINT | |  |  |  |  |  |  |  |  |  |  |  |  |  |
| 12 | Pc.c000603034.Contig1A | 1 - 1591 | - | 814828 | 816407 |  |  | 814828 |  |  |  |  |  |  |
| 12 | MALPY03554 | 1 - 297 | - | 814828 | 815140 |  |  |  |  |  | 264 |  |  |  |
| 12 | Pb.c000001756.Contig1A | 1 - 1263 | - | 814858 | 816121 | 1579 | 2204 |  | 816407 |  |  |  | PFC0870w | PB000958.03.0/PB000959.03.0 |
| 12 | MALPY03471 | 781 | - | 818611 | 819398 | 787 | 1985 | 818611 | 819398 |  | 264 | 2300 |  |  |
| 12 | MALPY00863 | 3235 | - | 821383 | 824987 |  |  | 821383 |  | 888 |  |  |  |  |
| 12 | Pb.c001904328.Contig1 | 1592 | + | 824069 | 825787 |  |  |  |  |  |  |  |  |  |
| 12 | PcContig687 | 2332 | + | 824510 | 826842 |  |  |  |  |  |  |  |  |  |
| 12 | MALPY00045 | 7530 | - | 825263 | 833539 |  |  |  |  | 888 | 295 |  |  |  |
| 12 | Pb.c000901430.Contig1 | 3208 | + | 828155 | 831480 |  |  |  |  |  |  |  |  |  |
| 12 | PcContig60 | 2117 | - | 832760 | 834877 |  |  |  |  |  |  |  |  |  |
| 12 | Pb.c002112256.Contig1 | 2628 | - | 833105 | 835479 |  |  |  |  |  |  |  |  |  |
| 12 | MALPY02155 | 2264 | + | 833677 | 835656 | 14273 | 216 |  | 835656 |  | 295 | 1000 |  |  |
| 12 | Pb.c001904405.Contig1 | 1930 | - | 835872 | 837655 |  |  | 835872 |  |  |  |  |  |  |
| 12 | MALPY00494 | 2474 | - | 836348 | 838599 |  |  |  |  | 944 | 295 | 1200 |  |  |
| 12 | Pb.c001904902.Contig1 | 793 | - | 837630 | 838422 | 2727 | 559 |  | 838599 |  |  |  |  |  |
| 12 | MALPY00163 | 17915 | - | 839158 | 856244 |  |  | 839158 |  | 944 |  |  |  |  |
| 12 | Pb.c000201600.Contig1 | 10522 | + | 839317 | 849274 |  |  |  |  |  |  |  |  |  |
| 12 | Pc.c000503439.Contig1 | 2350 | - | 842559 | 844909 |  |  |  |  |  |  |  |  |  |
| 12 | MALPY03508 | 874 | - | 843135 | 844009 |  |  |  |  |  |  |  |  |  |
| 12 | Pc.c001404010.Contig1 | 4255 | + | 845059 | 849272 |  |  |  |  |  |  |  |  |  |
| 12 | MALPY01667 | 9744 | - | 855114 | 864853 | 25695 | 1794 |  | 864853 |  | 206 |  |  |  |
| 12 | MALPY00510 | 3944 | - | 866647 | 870610 |  |  | 866647 |  |  | 206 | 1500 |  |  |
| 12 | Pc.c000602856.Contig1 | 2845 | + | 867498 | 870356 |  |  |  |  |  |  |  |  |  |
| 12 | Pb.c000001635.Contig1 | 2810 | + | 867766 | 870628 | 3981 | 498 |  | 870628 |  |  |  |  |  |
| 12 | Pc.c001707812.Contig1 | 1412 | - | 871126 | 872619 |  |  | 871126 |  |  |  |  |  |  |
| 12 | PbContig258 | 10504 | + | 871372 | 882106 |  |  |  |  |  |  |  |  |  |
| 12 | MALPY00121 | 17518 | - | 871519 | 890002 |  |  |  |  |  |  |  |  |  |
| 12 | Pc.c000403307.Contig1 | 769 | - | 872710 | 873479 |  |  |  |  |  |  |  |  |  |
| 12 | PcContig571 | 7138 | - | 874623 | 882132 |  |  |  |  |  |  |  |  |  |
| 12 | Pb.c000401452.Contig1 | 6490 | + | 883223 | 889650 |  |  |  |  |  |  |  |  |  |
| 12 | Pb.c000401156.Contig4 | 4622 | + | 889384 | 893862 |  |  |  |  |  |  |  |  |  |
| 12 | MALPY00741 | 4624 | + | 889971 | 894778 |  |  |  |  | 922 | 66A | 1100 |  |  |
| 12 | Pb.c000101607.Contig1 | 2375 | - | 894429 | 896804 |  |  |  |  |  |  |  |  |  |
| 12 | MALPY01109 | 8305 | - | 895148 | 903244 |  |  |  |  | 922 |  |  |  |  |
| 12 | PbContig170 | 4639 | - | 897063 | 901726 |  |  |  |  |  |  |  |  |  |
| 12 | Pc.c000903325.Contig1 | 2367 | - | 897108 | 899562 |  |  |  |  |  |  |  |  |  |
| 12 | Pc.c000402801.Contig1 | 1857 | - | 899684 | 901541 |  |  |  |  |  |  |  |  |  |
| 12 | Pb.c001602578.Contig1 | 3272 | - | 902183 | 905455 |  |  |  |  |  |  |  |  |  |
| TK12 | MALPY00097 | 3498 | - | 903613 | 907070 |  |  |  |  | 251 |  |  |  |  |
| man12 | MALPY00098 | 2702 | + | 906877 | 909579 |  |  |  |  | 251 |  |  |  |  |
| 12 | Pb.c000001814.Contig1 | 6284 | + | 908956 | 916368 |  |  |  |  |  |  |  |  |  |
| 12 | Pc.c001605841.Contig1 | 2864 | + | 909054 | 912185 |  |  |  |  |  |  |  |  |  |
| 12 | MALPY01078 | 24452 | + | 909352 | 934236 |  |  |  |  | 251 |  |  |  |  |
| 12 | Pc.c000403320.Contig1 | 832 | + | 912353 | 913185 |  |  |  |  |  |  |  |  |  |
| 12 | Pc.c001003232.Contig1 | 3085 | + | 913235 | 917086 |  |  |  |  |  |  |  |  |  |
| 12 | Pb.c000001776.Contig1 | 1884 | + | 916213 | 918136 |  |  |  |  |  |  |  |  |  |
| 12 | Pb.c000501374.Contig1 | 4634 | - | 920100 | 925016 |  |  |  |  |  |  |  |  |  |
| 12 | PcContig640 | 3531 | - | 921381 | 925307 |  |  |  |  |  |  |  |  |  |
| 12 | PbContig265 | 3892 | + | 924891 | 928786 |  |  |  |  |  |  |  |  |  |
| 12 | PcContig773 | 4277 | - | 925410 | 929938 |  |  |  |  |  |  |  |  |  |
| 12 | Pb.c001001672.Contig1 | 5097 | + | 928506 | 933600 |  |  |  |  |  |  |  |  |  |
| 12 | Pb.c000701230.Contig1 | 7886 | + | 933729 | 942359 |  |  |  |  |  |  |  |  |  |
| 12 | MALPY00331 | 8921 | + | 933777 | 943318 |  |  |  |  | 251 |  |  |  |  |
| 12 | Pc.c000302916.Contig1 | 3441 | - | 938602 | 942040 | 72192 | 283 |  | 943318 |  |  |  |  |  |
| 12 | MALPY00175 | 10856 | - | 943601 | 954925 |  |  | 943601 |  | 251 | 293 |  |  |  |
| 12 | PcContig61 | 7386 | + | 947261 | 954686 |  |  |  |  |  |  |  |  |  |
| 12 | Pb.c000401442.Contig1 | 2728 | + | 948220 | 950987 |  |  |  |  |  |  |  |  |  |
| 12 | Pb.c002006782.Contig1 | 1738 | - | 954650 | 956358 | 12757 | 3980 |  | 956358 |  |  |  |  |  |
| 12 | MALPY00630 | 3683 | - | 960338 | 963692 |  |  | 960338 |  |  | 293 | 4000 |  |  |
| 12 | Pc.c000703898.Contig1 | 796 | + | 962036 | 962832 |  |  |  |  |  |  |  |  |  |
| 12 | Pb.c000301409.Contig1 | 1083 | + | 962201 | 963284 | 3354 | 546 |  | 963692 |  |  |  |  |  |
| 12 | MALPY02397 | 5482 | + | 964238 | 969532 |  |  | 964238 |  |  |  |  |  |  |
| 12 | Pb.c002006961.Contig1 | 1433 | + | 964738 | 966168 |  |  |  |  |  |  |  |  |  |
| 12 | Pc.c000902707.Contig1 | 4726 | - | 966565 | 971233 |  |  |  |  |  |  |  |  |  |
| 12 | Pb.c001803549.Contig1 | 1685 | - | 969196 | 971001 |  |  |  |  |  |  |  |  |  |
| 12 | MALPY00103 | 22975 | + | 969821 | 993968 |  |  |  |  | 216 | 293 | 6500 |  |  |
| 12 | Pb.c000501525.Contig1 | 3244 | - | 980946 | 984136 |  |  |  |  |  |  |  |  |  |
| 12 | Pc.c000202828.Contig1 | 5550 | + | 984567 | 990222 |  |  |  |  |  |  |  |  |  |
| 12 | Pb.c001803406.Contig1 | 2101 | - | 986303 | 988516 | 29730 | 260 |  | 993968 |  |  |  |  |  |
| 12 | MALPY00409B | 1 - 3763 | + | 994228 | 997937 |  |  | 994228 |  | 216 | 171 | 600 | PFC1065w | PY01537 |
| 12 | Pb.c001702793.Contig1B | 2894 - 4831 | - | 996045 | 997937 |  |  |  |  |  |  |  |  |  |
| 12 | Pc.c000503109.Contig1 | 1 - 1390 | + | 996595 | 997937 | 3709 |  |  | 997937 |  |  |  |  |  |
| BREAKPOINT | |  |  |  |  |  |  |  |  |  |  |  |  |  |
|  |  |  |  |  |  |  |  |  |  |  |  |  |  |  |
| Unaligned Py contigs grouped with 1 or more contigs aligned along this P. falciparum chromosome | | | | | | | |  |  |  |  |  |  |  |
|  |  |  |  |  |  |  |  |  |  |  |  |  |  |  |
| JC4/9 | MALPY02599 | 3919 |  | none |  |  |  |  |  | 46A/B |  |  |  |  |
| JC4/9 | MALPY02465 | 3479 |  | none |  |  |  |  |  | 46A/B |  |  |  |  |
|  |  |  |  |  |  |  |  |  |  |  |  |  |  |  |
|  |  |  |  |  |  |  |  |  |  |  |  |  |  |  |
