# Supplementary material for: A Plasmodium Whole-Genome Synteny Map: Indels and Synteny Breakpoints as Foci for Species-Specific Genes
Source: PLOS journal article supplement (doi:10.1371/journal.ppat.0010044), 2005-12-19
Supplement: S11 (10.1371/journal.ppat.0010044.s011) [file journal.ppat.0010044.s011]

Table S11 - Pfchr9


# Table S11 - Pfchr9

| Table S11: Tiling path of RMP contigs aligned against P. falciparum chromosome 9. | | | | | |  |  |  |  |  |  |  |  |  |
|  |  |  |  |  |  |  |  |  |  |  |  |  |  |  |
| P. berghei (Pb), P. c. chabaudi (Pc) and P. y. yoelii (Py) contigs were aligned against P. falciparum (Pf) chromosome 9 and | | | | | | | | |  |  |  |  |  |  |
| combined into composite rodent malaria parasite (cRMP) contigs. The cRMP contigs were further linked by physical linkage | | | | | | | | |  |  |  |  |  |  |
| and PCR to form cRMP scaffolds. The tables also show gaps in the alignment (black lines), synteny breakpoints (violet bars), | | | | | | | | |  |  |  |  |  |  |
| cRMP telomeres (white bars), predicted centromeres (plum/black bars) and intrasyntenic P. falciparum-specific genes | | | | | | | |  |  |  |  |  |  |  |
| (grey bars, subgroups as described in Hall et al.). Contigs, physical groups or PCR groups flanking inter- or intrasyntenic regions | | | | | | | | |  |  |  |  |  |  |
| are printed in bold. Unaligned P. y. yoelii contigs grouped with 1 or more contigs aligned along this P. falciparum chromosome | | | | | | | | |  |  |  |  |  |  |
| could represent as yet unidentified cRMP-specific indels. Some of these could be pinned to the maps and the size of these | | | | | | | | |  |  |  |  |  |  |
| potential cRMP-specific indels and their gene content based on the P. y. yoelii annotation are listed in the last columns. | | | | | | | |  |  |  |  |  |  |  |
| Column headings are as follows: | |  |  |  |  |  |  |  |  |  |  |  |  |  |
|  |  |  |  |  |  |  |  |  |  |  |  |  |  |  |
| Pf chr.: P. falciparum chromosome to which the RMP contigs are aligned | | | | |  |  |  |  |  |  |  |  |  |  |
| (#: PROmer analysis� from this study; JC# and TK#: Carlton et al.; man#: manual BLAST analysis; colours refer to those used in Fig. 2 of the paper); | | | | | | | | | | |  |  |  |  |
| Pb Pc Py contig: names of the aligned RMP contigs; | | |  |  |  |  |  |  |  |  |  |  |  |  |
| Size: size (bp) of the aligned RMP contigs (regions of homology are shown for contigs interrupted by inter- or intrasyntenic regions); | | | | | | | | |  |  |  |  |  |  |
| +/-: orientation of the aligned RMP contigs; | |  |  |  |  |  |  |  |  |  |  |  |  |  |
| Start contig & End contig: estimated start & end coordinates of alignment of the RMP contigs | | | | | |  |  |  |  |  |  |  |  |  |
| based on the coordinates of PROmer hits and the size and orientation of contigs, inter- and intrasyntenic regions; | | | | | | | |  |  |  |  |  |  |  |
| cRMP contig size: size of cRMP contigs based on the corrected coordinates of alignment; | | | | | |  |  |  |  |  |  |  |  |  |
| Gap size to next cRMP contig: size of gaps (or indels) between neighbouring cRMP contigs; | | | | | |  |  |  |  |  |  |  |  |  |
| Start cRMP contig & End cRMP contig: estimated start & end coordinates of alignment of the cRMP contigs (or indels); | | | | | | | | |  |  |  |  |  |  |
| Phys. group (Py): physical linkage of neighbouring P. y. yoelii contigs; | | | | |  |  |  |  |  |  |  |  |  |  |
| PCR group (Py): neighbouring P. y. yoelii contigs were linked previously or for this study by PCR; | | | | | | |  |  |  |  |  |  |  |  |
| PCR size (Py): size of the PCR product; | |  |  |  |  |  |  |  |  |  |  |  |  |  |
| Pf gene: some P. falciparum gene names including all intra- and intersyntenic genes and genes flanking breakpoints in synteny or subtelomere linked ends; | | | | | | | | | | |  |  |  |  |
| RMP gene: orthologues of the above-mentioned P. falciparum genes. | | | | |  |  |  |  |  |  |  |  |  |  |
|  |  |  |  |  |  |  |  |  |  |  |  |  |  |  |
| Pf chr. | Pb Pc Py contig | Size | +/- | Start contig | End contig | cRMP contig size | Gap size to next cRMP contig | Start cRMP contig | End cRMP contig | Phys. group (Py) | PCR group (Py) | PCR size (Py) | Pf gene | RMP gene |
| Telomere | |  |  |  |  |  |  |  |  |  |  |  |  |  |
| man4 | PbContig4273 | 3102 | - | 117545 | 120647 |  |  | 117545 |  |  |  |  |  |  |
| man4 | PcContig6973 | 6448 | - | 120241 | 126689 |  |  |  |  |  |  |  |  |  |
| man4 | MALPY02400 | 3353 | - | 123642 | 126995 |  |  |  |  |  |  |  |  |  |
| man4 | PbContig3018 | 2609 | - | 124258 | 126867 |  |  |  |  |  |  |  |  |  |
| 4 | MALPY00495 | 12235 | + | 126461 | 139340 |  |  |  |  |  | 276 |  | PFI0145w | PY01822 |
| 4 | Pb.c001905057.Contig1 | 716 | - | 128910 | 129611 |  |  |  |  |  |  |  |  |  |
| 4 | MALPY02206 | 2515 | - | 129144 | 131647 |  |  |  |  |  |  |  |  |  |
| 4 | Pb.c001904538.Contig1 | 1869 | - | 129542 | 131411 |  |  |  |  |  |  |  |  |  |
| 4 | Pc.c000602392.Contig2 | 3089 | + | 132760 | 135862 | 21795 | 3648 |  | 139340 |  |  |  |  |  |
| 4 | MALPY00294 | 17252 | - | 142988 | 160814 |  |  | 142988 |  |  | 276 | 2000 |  |  |
| 4 | Pb.c001101540.Contig2 | 5198 | + | 143075 | 148246 |  |  |  |  |  |  |  |  |  |
| 4 | Pb.c001402042.Contig1 | 2520 | + | 146201 | 148724 |  |  |  |  |  |  |  |  |  |
| 4 | Pc.c001003250.Contig1 | 4393 | + | 146983 | 151548 |  |  |  |  |  |  |  |  |  |
| 4 | PbContig33 | 6957 | - | 148267 | 155586 |  |  |  |  |  |  |  |  |  |
| 4 | Pb.c001502609.Contig1 | 2418 | + | 155607 | 158157 |  |  |  |  |  |  |  |  |  |
| 4 | Pb.c002007820.Contig1 | 1319 | + | 158619 | 159974 | 17826 | 862 |  | 160814 |  |  |  |  |  |
| 4 | MALPY00304 | 38444 | - | 161676 | 203748 |  |  | 161676 |  | 439 | 276 | 850 |  |  |
| 4 | Pb.c000701446.Contig1 | 8868 | - | 161703 | 171031 |  |  |  |  |  |  |  |  |  |
| 4 | Pc.c000802696.Contig2 | 2507 | - | 162670 | 165450 |  |  |  |  |  |  |  |  |  |
| 4 | PcContig676 | 1031 | - | 165777 | 166808 |  |  |  |  |  |  |  |  |  |
| 4 | Pc.c000303447.Contig1 | 3669 | - | 167239 | 170874 |  |  |  |  |  |  |  |  |  |
| 4 | Pb.c001702368.Contig1 | 3924 | - | 173560 | 177335 |  |  |  |  |  |  |  |  |  |
| 4 | Pc.c000502944.Contig1 | 1099 | - | 175524 | 176476 |  |  |  |  |  |  |  |  |  |
| 4 | Pb.c001101971.Contig1 | 6313 | - | 177868 | 184274 |  |  |  |  |  |  |  |  |  |
| 4 | Pc.c001303501.Contig1 | 3708 | - | 179673 | 183471 |  |  |  |  |  |  |  |  |  |
| 4 | PcContig683 | 3647 | - | 184570 | 188478 |  |  |  |  |  |  |  |  |  |
| 4 | Pb.c001001812.Contig1 | 3898 | - | 184879 | 189123 |  |  |  |  |  |  |  |  |  |
| 4 | Pb.c002007063.Contig1 | 2370 | + | 191424 | 193779 |  |  |  |  |  |  |  |  |  |
| 4 | Pc.c001606354.Contig1 | 779 | - | 193696 | 194454 |  |  |  |  |  |  |  |  |  |
| 4 | Pb.c000901412.Contig1 | 7319 | + | 194125 | 201081 |  |  |  |  |  |  |  |  |  |
| 4 | Pc.c001505658.Contig1 | 853 | - | 194552 | 195405 |  |  |  |  |  |  |  |  |  |
| 4 | Pc.c000003029.Contig1 | 1184 | - | 200789 | 201973 |  |  |  |  |  |  |  |  |  |
| 4 | PbContig147 | 34246 | - | 201366 | 238756 |  |  |  |  |  |  |  |  |  |
| 4 | MALPY01493 | 5880 | + | 203450 | 209330 |  |  |  |  | 439 | 63 |  |  |  |
| 4 | Pc.c000403370.Contig1 | 6411 | - | 204545 | 210915 |  |  |  |  |  |  |  |  |  |
| 4 | MALPY02181 | 2648 | - | 209301 | 211949 |  |  |  |  |  | 63 | 450 |  |  |
| 4 | Pc.c001605827.Contig1 | 1758 | - | 213617 | 215489 |  |  |  |  |  |  |  |  |  |
| 4 | MALPY01419 | 4913 | - | 214013 | 218947 |  |  |  |  |  | 63 | 2000 |  |  |
| 4 | Pc.c001605847.Contig1 | 1078 | - | 216495 | 217582 |  |  |  |  |  |  |  |  |  |
| 4 | PcContig30 | 6428 | + | 221330 | 227652 |  |  |  |  |  |  |  |  |  |
| 4 | MALPY00016 | 20208 | - | 221953 | 244047 |  |  |  |  |  | 63 | 4000 |  |  |
| 4 | MALPY03480 | 337 | - | 222946 | 223279 |  |  |  |  |  |  |  |  |  |
| 4 | Pc.c000202208.Contig2 | 2093 | + | 230525 | 232603 |  |  |  |  |  |  |  |  |  |
| 4 | MALPY03408 | 821 | - | 239988 | 240821 |  |  |  |  |  |  |  |  |  |
| 4 | Pb.c000901735.Contig1 | 9680 | - | 239998 | 250003 |  |  |  |  |  |  |  |  |  |
| 4 | MALPY01396 | 18934 | - | 244235 | 264060 |  |  |  |  |  |  |  |  |  |
| 4 | Pc.c000803277.Contig1 | 2428 | + | 245135 | 247869 |  |  |  |  |  |  |  |  |  |
| 4 | Pc.c001812185.Contig1 | 1007 | + | 248546 | 249553 |  |  |  |  |  |  |  |  |  |
| 4 | PcContig653 | 2170 | + | 250148 | 252318 |  |  |  |  |  |  |  |  |  |
| 4 | Pb.c001001712.Contig1 | 3493 | + | 250438 | 253934 |  |  |  |  |  |  |  |  |  |
| 4 | Pc.c001606501.Contig1 | 632 | + | 252377 | 252967 |  |  |  |  |  |  |  |  |  |
| 4 | Pc.c000202705.Contig1 | 3613 | + | 253530 | 257236 |  |  |  |  |  |  |  |  |  |
| 4 | Pb.c001001713.Contig1 | 11398 | + | 254197 | 265790 |  |  |  |  |  |  |  |  |  |
| 4 | MALPY03139 | 210 | - | 254442 | 254652 |  |  |  |  |  |  |  |  |  |
| 4 | Pc.c000603489.Contig1 | 979 | - | 259472 | 260412 |  |  |  |  |  |  |  |  |  |
| 4 | Pc.c000502910.Contig1 | 710 | - | 260510 | 261220 |  |  |  |  |  |  |  |  |  |
| 4 | PcContig213 | 3813 | + | 261105 | 265225 |  |  |  |  |  |  |  |  |  |
| 4 | MALPY03559 | 840 | - | 264075 | 264915 |  |  |  |  |  |  |  |  |  |
| 4 | MALPY03027 | 1704 | + | 265624 | 267513 |  |  |  |  |  |  |  |  |  |
| 4 | Pc.c000202672.Contig1 | 1599 | + | 267095 | 268799 |  |  |  |  |  |  |  |  |  |
| 4 | PbContig280 | 5144 | + | 267414 | 272268 |  |  |  |  |  |  |  |  |  |
| 4 | MALPY03506 | 713 | + | 267494 | 268276 |  |  |  |  |  | 292 |  |  |  |
| 4 | MALPY00486 | 4150 | - | 268330 | 272158 |  |  |  |  | 173 | 292 | 500 |  |  |
| 4 | Pc.c001811928.Contig1 | 4809 | + | 269845 | 274630 |  |  |  |  |  |  |  |  |  |
| 4 | MALPY02131 | 4870 | - | 270887 | 275733 | 114057 | 1326 |  | 275733 | 173 | 26 |  |  |  |
| 4 | MALPY03000 | 1928 | + | 277059 | 278993 |  |  | 277059 |  |  | 26 | 1600 |  |  |
| 4 | Pc.c001707707.Contig1 | 2099 | + | 277608 | 279713 |  |  |  |  |  |  |  |  |  |
| 4 | Pb.c001101955.Contig1 | 1836 | + | 279236 | 281075 |  |  |  |  |  |  |  |  |  |
| 4 | MALPY01404 | 7336 | + | 280346 | 287751 |  |  |  |  | 502 |  |  |  |  |
| 4 | Pc.c001708515.Contig1 | 833 | + | 282704 | 283498 |  |  |  |  |  |  |  |  |  |
| 4 | Pb.c000401569.Contig1 | 4410 | + | 283127 | 287570 |  |  |  |  |  |  |  |  |  |
| 4 | PcContig513 | 6801 | - | 283789 | 290641 |  |  |  |  |  |  |  |  |  |
| JC4 | MALPY01119 | 5179 | + | 288831 | 294022 | 16963 | 48 |  | 294022 | 502 |  |  |  |  |
| 4 | MALPY01551 | 10045 | - | 294070 | 304118 |  |  | 294070 |  | 924 | 323 | 2200 |  |  |
| 4 | MALPY01980 | 3202 | + | 294102 | 297367 |  |  |  |  | 502 | 323 |  |  |  |
| 4 | Pc.c001204554.Contig1 | 1269 | + | 294908 | 296174 |  |  |  |  |  |  |  |  |  |
| 4 | Pc.c001405204.Contig1 | 793 | + | 296267 | 297060 |  |  |  |  |  |  |  |  |  |
| 4 | PcContig460 | 8102 | + | 298771 | 306831 |  |  |  |  |  |  |  |  |  |
| 4 | Pb.c001202190.Contig1 | 2783 | + | 303195 | 305981 |  |  |  |  |  |  |  |  |  |
| 4 | MALPY02811 | 2595 | - | 304829 | 307424 | 13354 | 780 |  | 307424 | 924 | 263 |  |  |  |
| 4 | MALPY02563 | 3913 | + | 308204 | 312135 |  |  | 308204 |  |  | 322 |  | PFI0305c | PY07152 |
| 4 | MALPY01573 | 7469 | + | 310228 | 319753 |  |  |  |  |  | 263 | 2500 |  |  |
| 4 | Pb.c001803325.Contig1 | 3056 | - | 310700 | 313806 |  |  |  |  |  |  |  |  |  |
| 4 | Pc.c000903471.Contig1 | 1258 | - | 312771 | 314150 |  |  |  |  |  |  |  |  |  |
| 4 | Pb.c001702849.Contig1 | 4062 | - | 316078 | 320158 |  |  |  |  |  |  |  |  |  |
| 4 | MALPY00994 | 1 - 4201 (4233) | + | 318094 | 323147 |  |  |  |  |  |  |  | PFI0325c | PY03445 |
| 4 | MALPY03153 | 532 | - | 318697 | 319235 |  |  |  |  |  | 322 | 2800 | � |  |
| 4 | Pc.c001811890.Contig1 | 2884 | - | 321715 | 323147 | 14943 | 13323 |  | 323147 |  |  |  |  |  |
| BREAKPOINT | |  |  |  |  |  | 4098 | 330496 | 334594 |  |  |  | PFI0330c |  |
| 8 | MALPY01621B | 4469 - 6091 | + | 336470 | 338104 |  |  | 336470 |  |  | 166 |  | PFI0335w | PY05144 |
| 8 | PcContig784 | 2465 | + | 336484 | 337440 | 1634 | 2597 |  | 338104 |  |  |  |  |  |
| TK8 | MALPY00534 | 3440 | - | 340701 | 343701 | 3000 | 1340 | 340701 | 343701 | 69 |  |  |  |  |
| 8 | MALPY00535 | 9398 | - | 345041 | 355152 |  |  | 345041 |  | 69 |  |  | PFI0355c | PY01951 |
| 8 | Pb.c002113653.Contig1 | 627 | - | 346645 | 347272 |  |  |  |  |  |  |  |  |  |
| 8 | PcContig135 | 6368 | + | 348542 | 355087 |  |  |  |  |  |  |  |  |  |
| 8 | Pb.c001401768.Contig1 | 5912 | + | 349340 | 355445 |  |  |  |  |  |  |  |  |  |
| 8 | MALPY03284 | 779 | - | 352597 | 353349 | 10404 | 4219 |  | 355445 |  |  |  |  |  |
| GAP |  |  |  |  |  |  | 1018 | 356658 | 357676 |  |  |  | PFI0360c | Expanded |
| 8 | MALPY01236 | 5242 | + | 359664 | 365348 |  |  | 359664 |  |  | 287 |  | PFI0365w | PY04116 |
| 8 | Pb.c001802859.Contig1 | 4148 | - | 360247 | 364950 |  |  |  |  |  |  |  |  |  |
| 8 | Pc.c001812787.Contig1 | 636 | - | 360450 | 361086 | 5684 | 953 |  | 365348 |  |  |  |  |  |
| 8 | MALPY00470 | 5831 | + | 366301 | 372018 |  |  | 366301 |  |  | 287 | 1000 |  |  |
| 8 | PbContig39 | 3959 | - | 368201 | 372440 | 6139 | 5268 |  | 372440 |  |  |  |  |  |
| TK8 | MALPY02283 | 2452 | + | 377708 | 380224 | 2516 | 297 | 377708 | 380224 | 679 |  |  | PFI0395w | PY06648 |
| man8 | MALPY03224 | 1413 | - | 380521 | 381706 |  |  | 380521 |  | 679 |  |  |  |  |
| 8 | Pc.c001812939.Contig1 | 755 | - | 381127 | 381891 |  |  |  |  |  |  |  |  |  |
| man8 | MALPY01708A | 1 - 3646 | + | 381592 | 385708 |  |  |  |  | 679 | 113 |  | PFI0395w/PFI0400c | PY05388 (exon2-6) |
| 8 | Pb.c001202087.Contig1 | 3099 | + | 382362 | 385461 | 5187 | 13486 |  | 385708 |  |  |  |  |  |
| Insert |  |  |  |  |  |  | 10089 | 387918 | 398007 |  |  |  | PFI0405w - PFI0410c |  |
| 8 | PbContig338 | 6418 | - | 399194 | 404182 |  |  | 399194 |  |  |  |  |  |  |
| 8 | Pc.c001708712.Contig1 | 1476 | - | 399194 | 400067 |  |  |  |  |  |  |  |  |  |
| man8 | MALPY01708B | 5128 - 5872 | + | 399194 | 400058 |  |  |  |  | 679 | 113 |  | PFI0415c | PY05388 (exon1) |
| 8 | Pc.c000602858.Contig1 | 7180 | - | 400222 | 407833 |  |  |  |  |  |  |  |  |  |
| 8 | MALPY03231 | 959 | - | 400230 | 401189 |  |  |  |  |  | 113 | 600 |  |  |
| 8 | MALPY01881 | 2018 | + | 401616 | 403634 |  |  |  |  |  | 113 | 600 |  |  |
| 8 | MALPY01450 | 4531 | - | 403852 | 409398 |  |  |  |  |  | 113 | 700 |  |  |
| 8 | Pb.c000801818.Contig1 | 2447 | - | 404451 | 407072 |  |  |  |  |  |  |  |  |  |
| 8 | PcContig68 | 1842 | - | 408948 | 410781 |  |  |  |  |  |  |  |  |  |
| TK8 | MALPY01983 | 4332 | - | 410427 | 414174 | 14980 | 613 |  | 414174 | 571 |  |  |  |  |
| 8 | MALPY00886 | 17996 | - | 414787 | 435763 |  |  | 414787 |  | 571 | 113 | 6000 |  |  |
| 8 | Pb.c001904892.Contig1 | 883 | + | 415240 | 416099 |  |  |  |  |  |  |  |  |  |
| 8 | PbContig138 | 2653 | + | 417322 | 419966 |  |  |  |  |  |  |  |  |  |
| 8 | Pc.c001811688.Contig1 | 2385 | - | 418396 | 420942 |  |  |  |  |  |  |  |  |  |
| 8 | Pb.c000101395.Contig1 | 3251 | + | 420328 | 424665 |  |  |  |  |  |  |  |  |  |
| 8 | Pb.c000101398.Contig1 | 3779 | + | 424633 | 428472 |  |  |  |  |  |  |  |  |  |
| 8 | Pc.c001606041.Contig1 | 1057 | - | 424664 | 425679 |  |  |  |  |  |  |  |  |  |
| 8 | PcContig120 | 3052 | - | 425805 | 428917 |  |  |  |  |  |  |  |  |  |
| 8 | Pb.c000101400.Contig1 | 5282 | + | 429203 | 434902 |  |  |  |  |  |  |  |  |  |
| 8 | Pc.c000402759.Contig1 | 2875 | - | 429913 | 433172 | 20976 | 2061 |  | 435763 |  |  |  |  |  |
| man8 | MALPY02482 | 2914 | + | 437824 | 440738 |  |  | 437824 |  | 571 |  |  |  |  |
| 8 | Pc.c000803798.Contig1 | 1366 | - | 440210 | 441582 |  |  |  |  |  |  |  |  |  |
| 8 | MALPY01012 | 16718 | + | 440769 | 458206 |  |  |  |  | 571 |  |  |  |  |
| 8 | Pb.c001101486.Contig4 | 16761 | - | 440826 | 458409 |  |  |  |  |  |  |  |  |  |
| 8 | Pc.c000002570.Contig1 | 6435 | - | 443968 | 450635 |  |  |  |  |  |  |  |  |  |
| 8 | Pc.c000302870.Contig1 | 1475 | - | 450640 | 452169 |  |  |  |  |  |  |  |  |  |
| 8 | MALPY03374 | 805 | + | 450885 | 451684 |  |  |  |  |  |  |  |  |  |
| 8 | Pc.c000703303.Contig1 | 1447 | - | 452208 | 453593 |  |  |  |  |  |  |  |  |  |
| 8 | Pc.c000903475.Contig1 | 2977 | - | 454893 | 457881 |  |  |  |  |  |  |  |  |  |
| 8 | PcContig476 | 3894 | - | 457971 | 461978 |  |  |  |  |  |  |  |  |  |
| 8 | MALPY03054 | 562 | - | 458555 | 459119 |  |  |  |  |  | 112 |  |  |  |
| 8 | Pb.c000901861.Contig1 | 4988 | - | 458585 | 463684 |  |  |  |  |  |  |  |  |  |
| 8 | MALPY01755 | 2888 | + | 459496 | 462375 | 25860 | 8762 |  | 463684 |  | 112 | 500 |  |  |
| 8 | Pc.c001204014.Contig1 | 1399 | + | 472446 | 473845 | 1399 | 755 | 472446 | 473845 |  |  |  |  |  |
| 8 | Pb.c000801811.Contig1 | 5866 | + | 474600 | 480648 |  |  | 474600 |  |  |  |  |  |  |
| 8 | MALPY01772 | 6010 | + | 475346 | 482019 |  |  |  |  |  | 247 |  | PFI0505c | PY05530 |
| 8 | PcContig782 | 5069 | - | 475378 | 480685 | 7419 | 5712 |  | 482019 |  |  |  |  |  |
| Insert |  |  |  |  |  |  | 5093 | 482452 | 487545 |  |  |  | PFI0510c |  |
| 8 | Pb.c000301481.Contig1 | 3947 | - | 487731 | 491678 |  |  | 487731 |  |  |  |  |  |  |
| 8 | MALPY00231 | 11290 | - | 488185 | 499583 |  |  |  |  | 511 | 247 | 800 | PFI0515w | n.a. |
| 8 | Pb.c000201634.Contig1 | 6846 | - | 491445 | 498845 |  |  |  |  |  |  |  |  |  |
| 8 | PcContig714 | 4047 | + | 493313 | 497461 |  |  |  |  |  |  |  |  |  |
| 8 | MALPY03339 | 492 | - | 496425 | 496917 |  |  |  |  |  | 329 |  |  |  |
| 8 | Pc.c001606563.Contig1 | 1046 | + | 497380 | 498435 | 11852 | 754 |  | 499583 |  |  |  |  |  |
| 8 | MALPY00095 | 22812 | + | 500337 | 523929 |  |  | 500337 |  | 511 | 329 | 3800 |  |  |
| 8 | PcContig412 | 1603 | - | 500569 | 502169 |  |  |  |  |  |  |  |  |  |
| 8 | PbContig8 | 5480 | - | 500743 | 506220 |  |  |  |  |  |  |  |  |  |
| 8 | Pb.c000601185.Contig1 | 13652 | - | 507147 | 520999 |  |  |  |  |  |  |  |  |  |
| 8 | Pc.c000903415.Contig1 | 4148 | + | 516181 | 520285 |  |  |  |  |  |  |  |  |  |
| 8 | MALPY03476 | 243 | - | 519065 | 519308 |  |  |  |  |  |  |  |  |  |
| TK8 | MALPY00771 | 5074 | - | 523739 | 528245 | 27908 | 802 |  | 528245 | 511 |  |  |  |  |
| 8 | MALPY00985 | 22503 | - | 529047 | 553221 |  |  | 529047 |  | 125 |  |  | PFI0600w | n.a. |
| 8 | Pb.c000801664.Contig1 | 8026 | + | 529902 | 538717 |  |  |  |  |  |  |  |  |  |
| 8 | Pc.c001203848.Contig1 | 3389 | - | 530336 | 534177 |  |  |  |  |  |  |  |  |  |
| 8 | Pc.c001003396.Contig1 | 2225 | - | 534662 | 536860 |  |  |  |  |  |  |  |  |  |
| 8 | Pb.c002006852.Contig1 | 1696 | + | 546766 | 548510 |  |  |  |  |  |  |  |  |  |
| 8 | Pb.c001402075.Contig1 | 5940 | - | 550555 | 558520 |  |  |  |  |  |  |  |  |  |
| 8 | PcContig393 | 13035 | - | 553852 | 567783 |  |  |  |  |  |  |  |  |  |
| 8 | MALPY03107 | 1704 | - | 554924 | 556628 |  |  |  |  | 125 | 208 |  |  |  |
| 8 | MALPY00993 | 7948 | + | 559584 | 567987 |  |  |  |  | 154 | 208 | 3000 | PFI0620w | n.a. |
| 8 | PbContig373 | 9742 | - | 560291 | 570457 |  |  |  |  |  |  |  |  |  |
| 8 | MALPY01586 | 5187 | + | 567276 | 572231 |  |  |  |  | 154 | 38 |  |  |  |
| 8 | PcContig678 | 1204 | - | 568036 | 569240 |  |  |  |  |  |  |  |  |  |
| 8 | PcContig256 | 3008 | - | 569391 | 572417 | 43370 | 1500 |  | 572417 |  |  |  |  |  |
| 8 | MALPY02062 | 2399 | + | 573917 | 576316 |  |  | 573917 |  | 218 | 38 | 1600 | PFI0645w | PY06160 |
| 8 | MALPY01500 | 2989 | - | 575930 | 578884 |  |  |  |  | 218 |  |  |  |  |
| 8 | Pc.c001304283.Contig1 | 2499 | - | 576478 | 579035 |  |  |  |  |  |  |  |  |  |
| 8 | Pb.c001101887.Contig1 | 1976 | + | 577447 | 579289 | 5372 | 534 |  | 579289 |  |  |  |  |  |
| 8 | MALPY01070 | 3716 | + | 579823 | 583663 |  |  | 579823 |  | 218 | 43 |  |  |  |
| 8 | Pb.c001602048.Contig1 | 6290 | + | 580252 | 586678 |  |  |  |  |  |  |  |  |  |
| 8 | Pc.c000502396.Contig3 | 6090 | - | 580358 | 586690 | 6867 | 901 |  | 586690 |  |  |  |  |  |
| 8 | MALPY00683 | 20371 | + | 587591 | 610630 |  |  | 587591 |  |  | 43 | 2800 | PFI0675w | n.a. |
| 8 | Pb.c002007019.Contig1 | 2583 | + | 587690 | 590198 |  |  |  |  |  |  |  |  |  |
| 8 | Pc.c001404721.Contig1 | 1496 | + | 588509 | 589899 |  |  |  |  |  |  |  |  |  |
| 8 | Pc.c001204417.Contig1 | 1377 | + | 590217 | 591561 |  |  |  |  |  |  |  |  |  |
| 8 | Pb.c001803542.Contig1 | 3215 | + | 590696 | 593911 |  |  |  |  |  |  |  |  |  |
| 8 | Pc.c000002082.Contig1 | 4484 | - | 596726 | 601883 |  |  |  |  |  |  |  |  |  |
| 8 | Pb.c002006901.Contig1 | 2061 | + | 598848 | 601044 |  |  |  |  |  |  |  |  |  |
| 8 | PcContig426 | 6929 | - | 604664 | 611673 |  |  |  |  |  |  |  |  |  |
| 8 | PbContig67 | 3672 | - | 606968 | 610743 | 24082 | 984 |  | 611673 |  |  |  |  |  |
| 8 | MALPY01247 | 4048 | - | 612657 | 616807 |  |  | 612657 |  |  | 43 | 1300 |  |  |
| 8 | Pb.c001202325.Contig1 | 1120 | + | 613681 | 614867 |  |  |  |  |  |  |  |  |  |
| 8 | Pb.c000001641.Contig1 | 5655 | + | 616189 | 622432 |  |  |  |  |  |  |  |  |  |
| 8 | MALPY00658 | 6787 | - | 617159 | 624429 |  |  |  |  |  | 43 | 900 |  |  |
| 8 | Pc.c001605978.Contig1 | 5390 | + | 617372 | 623341 | 11772 | 2149 |  | 624429 |  |  |  |  |  |
| 8 | MALPY02153 | 2594 | + | 626578 | 629204 |  |  | 626578 |  |  | 43 | 1800 |  |  |
| 8 | Pb.c001402191.Contig1 | 1790 | - | 627408 | 629263 | 2685 | 864 |  | 629263 |  |  |  |  |  |
| 8 | Pb.c001402199.Contig1 | 1925 | + | 630127 | 632136 |  |  | 630127 |  |  |  |  |  |  |
| 8 | Pc.c001708176.Contig1 | 831 | - | 630336 | 631167 |  |  |  |  |  |  |  |  |  |
| 8 | MALPY00733 | 4574 | + | 630363 | 635283 |  |  |  |  | 153 | 43 | 1500 |  |  |
| 8 | PcContig115 | 3502 | - | 631605 | 635397 |  |  |  |  |  |  |  |  |  |
| 8 | Pb.c001402123.Contig1 | 4750 | + | 633150 | 637852 |  |  |  |  |  |  |  |  |  |
| 8 | MALPY00984 | 6483 | - | 636632 | 643004 |  |  |  |  | 153 |  |  |  |  |
| 8 | Pc.c000803951.Contig1 | 1208 | + | 640179 | 641342 |  |  |  |  |  |  |  |  |  |
| 8 | Pc.c000703426.Contig1 | 1133 | + | 642752 | 643869 |  |  |  |  |  |  |  |  |  |
| 8 | MALPY03066 | 1582 | - | 642883 | 644219 |  |  |  |  | 153 | 138 |  |  |  |
| 8 | Pb.c000401460.Contig1 | 6400 | - | 643005 | 649313 |  |  |  |  |  |  |  |  |  |
| 8 | Pc.c000703424.Contig1 | 1600 | + | 643763 | 645363 |  |  |  |  |  |  |  |  |  |
| 8 | MALPY00348 | 12993 | + | 646677 | 659957 |  |  |  |  | 54 | 138 | 2500 |  |  |
| 8 | Pc.c000303019.Contig1 | 2431 | - | 647340 | 649870 |  |  |  |  |  |  |  |  |  |
| 8 | Pb.c000701500.Contig1 | 4274 | - | 650061 | 654572 |  |  |  |  |  |  |  |  |  |
| 8 | PcContig681 | 5008 | - | 650855 | 656101 |  |  |  |  |  |  |  |  |  |
| 8 | MALPY03271 | 1723 | + | 650963 | 652678 |  |  |  |  |  | 40 |  |  |  |
| 8 | Pb.c000101315.Contig1 | 1474 | + | 657575 | 659004 |  |  |  |  |  |  |  |  |  |
| 8 | MALPY02770 | 5359 | - | 659921 | 665569 |  |  |  |  | 54 | 40 | 6000 |  |  |
| 8 | Pb.c000001789.Contig1 | 3757 | + | 660855 | 664965 |  |  |  |  |  |  |  |  |  |
| 8 | Pc.c000803431.Contig1 | 2802 | - | 661593 | 664757 | 35442 | 16 |  | 665569 |  |  |  |  |  |
| 8 | MALPY00256 | 3872 | + | 665585 | 669603 |  |  | 665585 |  | 54 | 40 | 500 |  |  |
| 8 | Pc.c001003453.Contig1 | 3258 | - | 665915 | 669283 |  |  |  |  |  |  |  |  |  |
| 8 | Pb.c001904504.Contig1 | 4059 | - | 666700 | 670891 | 5306 | 3305 |  | 670891 |  |  |  |  |  |
| 8 | Pc.c000703458.Contig1 | 3110 | - | 674196 | 677276 |  |  | 674196 |  |  |  |  |  |  |
| 8 | MALPY00059 | 7716 | + | 674230 | 682420 |  |  |  |  |  | 40 | 4000 |  |  |
| 8 | Pb.c001301811.Contig1 | 1834 | - | 677131 | 679364 |  |  |  |  |  |  |  |  |  |
| 8 | Pc.c001505142.Contig1 | 1973 | + | 679064 | 681197 |  |  |  |  |  |  |  |  |  |
| 8 | Pb.c001702286.Contig1 | 2742 | - | 679751 | 682481 |  |  |  |  |  |  |  |  |  |
| 8 | Pc.c000403241.Contig1 | 1015 | + | 681496 | 682511 | 8315 | 2907 |  | 682511 |  |  |  |  |  |
| 8 | Pc.c000502441.Contig2 | 8103 | - | 685418 | 693521 |  |  | 685418 |  |  |  |  |  |  |
| 8 | MALPY01407 | 3286 | - | 690188 | 693474 |  |  |  |  |  | 40 | 5000 |  |  |
| 8 | Pb.c002112847.Contig1 | 1014 | + | 692319 | 693318 | 8103 | 865 |  | 693521 |  |  |  |  |  |
| 8 | PbContig152 | 4273 | + | 694386 | 698863 |  |  | 694386 |  |  |  |  |  |  |
| 8 | MALPY02458 | 3384 | - | 694511 | 698120 |  |  |  |  |  | 40 | 900 |  |  |
| 8 | Pc.c000202801.Contig1 | 1662 | - | 694871 | 696527 |  |  |  |  |  |  |  |  |  |
| 8 | Pc.c000303021.Contig1 | 1246 | - | 696939 | 698200 | 4477 | 3734 |  | 698863 |  |  |  |  |  |
| 8 | Pb.c000801690.Contig1 | 4275 | - | 702597 | 706860 |  |  | 702597 |  |  |  |  |  |  |
| 8 | Pc.c000602947.Contig1 | 2732 | - | 704063 | 706777 |  |  |  |  |  |  |  |  |  |
| 8 | MALPY00930 | 7718 | - | 704747 | 712372 |  |  |  |  | 1308 | 140 |  |  |  |
| 8 | Pb.c002113121.Contig1 | 1500 | - | 707250 | 708750 |  |  |  |  |  |  |  |  |  |
| 8 | Pb.c000901835.Contig1 | 986 | - | 711138 | 712125 |  |  |  |  |  |  |  |  |  |
| 8 | MALPY02578 | 7420 | + | 712122 | 719990 |  |  |  |  | 1308 | 140 | 700 |  |  |
| 8 | Pb.c000901836.Contig1 | 3067 | - | 712702 | 716282 |  |  |  |  |  |  |  |  |  |
| 8 | Pc.c001103666.Contig1 | 4898 | - | 715064 | 720141 |  |  |  |  |  |  |  |  |  |
| 8 | Pb.c001102002.Contig1 | 2375 | - | 716866 | 719247 | 17544 | 309 |  | 720141 |  |  |  |  |  |
| 8 | MALPY02605 | 6518 | - | 720450 | 726968 |  |  | 720450 |  | 474 | 140 | 850 |  |  |
| 8 | PbContig194 | 9709 | - | 724259 | 734180 |  |  |  |  |  |  |  |  |  |
| 8 | PcContig417 | 8319 | + | 725193 | 733801 |  |  |  |  |  |  |  |  |  |
| 8 | MALPY02026 | 9616 | - | 727008 | 736692 |  |  |  |  | 474 |  |  |  |  |
| 8 | Pc.c000803840.Contig1 | 613 | + | 733821 | 734434 |  |  |  |  |  |  |  |  |  |
| 8 | MALPY01566 | 8199 | - | 736050 | 744735 |  |  |  |  | 474 |  |  |  |  |
| 8 | PbContig81 | 5960 | + | 737717 | 744165 |  |  |  |  |  |  |  |  |  |
| 8 | Pc.c000002512.Contig1 | 1849 | + | 739814 | 741666 |  |  |  |  |  |  |  |  |  |
| 8 | Pc.c000102501.Contig1 | 1356 | + | 742499 | 743858 | 24285 | 2790 |  | 744735 |  |  |  |  |  |
| 8 | Pc.c000903332.Contig1 | 2280 | + | 747525 | 749625 |  |  | 747525 |  |  |  |  |  |  |
| 8 | MALPY02481 | 3008 | + | 747718 | 750421 |  |  |  |  | 177 |  |  |  |  |
| 8 | Pb.c001301794.Contig1 | 7283 | - | 748763 | 756155 |  |  |  |  |  |  |  |  |  |
| 8 | Pc.c000102567.Contig1 | 2908 | + | 749526 | 752421 |  |  |  |  |  |  |  |  |  |
| 8 | MALPY00734 | 14240 | - | 750076 | 764821 |  |  |  |  | 177 |  |  | PFI0905w | n.a. |
| 8 | Pc.c000202894.Contig1 | 5065 | + | 753844 | 759363 |  |  |  |  |  |  |  |  |  |
| 8 | Pb.c001502887.Contig1 | 861 | + | 757281 | 758163 |  |  |  |  |  |  |  |  |  |
| 8 | Pb.c001301451.Contig1 | 4410 | + | 758800 | 763306 |  |  |  |  |  |  |  |  |  |
| 8 | Pc.c000302848.Contig1 | 3818 | + | 759589 | 763413 |  |  |  |  |  |  |  |  |  |
| 8 | Pc.c000303363.Contig1 | 1062 | + | 764131 | 765193 |  |  |  |  |  |  |  |  |  |
| 8 | MALPY02597 | 3861 | + | 765081 | 768813 |  |  |  |  | 177 |  |  |  |  |
| 8 | Pb.c001402071.Contig1 | 6205 | + | 768744 | 774955 |  |  |  |  |  |  |  |  |  |
| 8 | MALPY02370 | 5562 | + | 769739 | 775307 |  |  |  |  | 177 | 201 |  | PFI0915w | PY06799 - PY06800 |
| 8 | Pc.c001003499.Contig1 | 2605 | - | 770924 | 773538 | 27782 | 1303 |  | 775307 |  |  |  |  |  |
| 8 | PbContig320 | 5208 | + | 776610 | 781860 |  |  | 776610 |  |  |  |  |  |  |
| 8 | MALPY00434 | 6394 | - | 776746 | 783279 |  |  |  |  |  | 201 | 1000 |  |  |
| 8 | Pc.c000602952.Contig1 | 3350 | + | 779377 | 782846 |  |  |  |  |  |  |  |  |  |
| 8 | Pb.c001502847.Contig1 | 1094 | + | 781956 | 783089 | 6669 | 1722 |  | 783279 |  |  |  |  |  |
| 8 | Pc.c000703370.Contig1 | 3492 | + | 785001 | 788524 |  |  | 785001 |  |  |  |  |  |  |
| 8 | Pb.c001401744.Contig2 | 3312 | + | 785806 | 789095 |  |  |  |  |  |  |  |  |  |
| 8 | MALPY01687 | 14101 | - | 786313 | 801212 |  |  |  |  |  | 201 | 3000 |  |  |
| 8 | Pc.c000303459.Contig1 | 974 | - | 787800 | 788786 |  |  |  |  |  |  |  |  |  |
| 8 | Pc.c000402854.Contig1 | 2450 | - | 789068 | 791527 |  |  |  |  |  |  |  |  |  |
| 8 | Pb.c001803811.Contig1 | 1097 | + | 789744 | 790841 |  |  |  |  |  |  |  |  |  |
| 8 | Pb.c001501981.Contig1 | 4044 | - | 792892 | 797204 |  |  |  |  |  |  |  |  |  |
| 8 | Pc.c000002054.Contig2 | 5694 | - | 794784 | 800484 |  |  |  |  |  |  |  |  |  |
| 8 | Pb.c001803531.Contig1 | 2821 | + | 799243 | 801932 |  |  |  |  |  |  |  |  |  |
| 8 | Pc.c001404776.Contig1 | 1869 | - | 800855 | 802694 |  |  |  |  |  |  |  |  |  |
| 8 | Pb.c002007059.Contig1 | 2548 | + | 802262 | 804801 |  |  |  |  |  |  |  |  |  |
| 8 | MALPY01705 | 15418 | - | 802702 | 820281 |  |  |  |  |  | 201 | 1400 |  |  |
| 8 | Pc.c000302830.Contig1 | 3893 | - | 804377 | 808544 |  |  |  |  |  |  |  |  |  |
| 8 | Pb.c000501474.Contig1 | 2144 | + | 804796 | 806913 |  |  |  |  |  |  |  |  |  |
| 8 | Pb.c001904498.Contig1 | 4036 | + | 816020 | 820248 |  |  |  |  |  |  |  |  |  |
| 8 | Pc.c000502967.Contig1 | 595 | + | 818089 | 818684 |  |  |  |  |  |  |  |  |  |
| 8 | PcContig744 | 6335 | + | 818240 | 824970 |  |  |  |  |  |  |  |  |  |
| 8 | MALPY01660 | 3305 | + | 821416 | 825000 | 39999 | 99 |  | 825000 | 121 | 201 | 2000 |  |  |
| 8 | MALPY01661 | 5617 | - | 825099 | 830845 |  |  | 825099 |  | 121 | 204 |  |  |  |
| 8 | Pc.c001003999.Contig1 | 4631 | + | 826512 | 831221 |  |  |  |  |  |  |  |  |  |
| 8 | Pb.c000201291.Contig1 | 7606 | + | 826733 | 834496 |  |  |  |  |  |  |  |  |  |
| man8 | MALPY02394 | 2431 | + | 832129 | 834560 | 9461 | 3170 |  | 834560 |  |  |  |  |  |
| man8 | PcContig4067 | 1369 | - | 837730 | 839099 |  |  | 837730 |  |  |  |  |  |  |
| 8 | MALPY01744 | 3715 | + | 838691 | 842406 |  |  |  |  |  | 204 | 5000 |  |  |
| 8 | Pb.c000801706.Contig1 | 3645 | + | 839415 | 843060 |  |  |  |  |  |  |  |  |  |
| 8 | PcContig335 | 3364 | + | 839916 | 843280 |  |  |  |  |  |  |  |  |  |
| TK8 | MALPY00723 | 3991 | - | 842932 | 847516 | 9786 | 531 |  | 847516 | 161 |  |  |  |  |
| 8 | MALPY01053 | 15293 | + | 848047 | 864600 |  |  | 848047 |  | 161 | 204 | 3500 |  |  |
| 8 | PcContig428 | 7712 | + | 848239 | 856635 |  |  |  |  |  |  |  |  |  |
| 8 | Pb.c000201577.Contig1 | 6885 | + | 851463 | 859209 |  |  |  |  |  |  |  |  |  |
| 8 | Pc.c001505514.Contig1 | 945 | + | 857911 | 858909 | 16553 | 4108 |  | 864600 |  |  |  |  |  |
| 8 | MALPY00684 | 5799 | + | 868708 | 874742 |  |  | 868708 |  |  | 90/204 | 2600 |  |  |
| 8 | Pb.c001702861.Contig1 | 2418 | + | 871731 | 874172 |  |  |  |  |  |  |  |  |  |
| 8 | Pc.c001505752.Contig1 | 1281 | - | 871926 | 873239 |  |  |  |  |  |  |  |  |  |
| 8 | Pc.c000703339.Contig1 | 1973 | - | 873456 | 875511 | 6803 | 583 |  | 875511 |  |  |  |  |  |
| 8 | MALPY01448 | 3484 | + | 876094 | 879548 | 3454 | 1457 | 876094 | 879548 |  |  |  |  |  |
| 8 | MALPY01436 | 5455 | + | 881005 | 886424 |  |  | 881005 |  | 615 | 90 | 4000 |  |  |
| 8 | PcContig308 | 4486 | + | 881973 | 886573 |  |  |  |  |  |  |  |  |  |
| 8 | Pb.c001502449.Contig1 | 2998 | + | 882049 | 885086 | 5568 | 68 |  | 886573 |  |  |  |  |  |
| 8 | MALPY03137 | 1982 | - | 886641 | 888620 |  |  | 886641 |  | 615 | 94 |  |  |  |
| 8 | Pb.c002113218.Contig1 | 614 | - | 888132 | 888743 |  |  |  |  |  |  |  |  |  |
| 8 | Pc.c001606186.Contig1 | 1766 | + | 888487 | 890253 |  |  |  |  |  |  |  |  |  |
| 8 | Pb.c001602439.Contig1 | 10411 | - | 889375 | 900202 |  |  |  |  |  |  |  |  |  |
| 8 | MALPY00050 | 11456 | - | 889620 | 901187 |  |  |  |  |  | 94 | 1500 |  |  |
| 8 | Pc.c001304244.Contig1 | 5786 | + | 891740 | 897843 |  |  |  |  |  |  |  |  |  |
| 8 | Pc.c000402705.Contig1 | 4792 | - | 900964 | 905755 |  |  |  |  |  |  |  |  |  |
| 8 | Pb.c000801794.Contig1 | 4658 | - | 901453 | 906111 |  |  |  |  |  |  |  |  |  |
| 8 | MALPY02095 | 4183 | + | 902687 | 906870 |  |  |  |  |  | 94 | 1000 |  |  |
| 8 | Pb.c000801418.Contig1 | 2859 | - | 906637 | 909131 |  |  |  |  |  |  |  |  |  |
| 8 | Pc.c000503049.Contig1 | 1904 | - | 906652 | 908556 |  |  |  |  |  |  |  |  |  |
| 8 | MALPY01398 | 8264 | - | 907605 | 915601 |  |  |  |  |  | 105 |  |  |  |
| 8 | PcContig52 | 4952 | + | 908225 | 913192 |  |  |  |  |  |  |  |  |  |
| 8 | Pb.c001502534.Contig1 | 10847 | - | 909285 | 920870 |  |  |  |  |  |  |  |  |  |
| 8 | PcContig220 | 3850 | + | 913267 | 917870 |  |  |  |  |  |  |  |  |  |
| 8 | MALPY01441 | 3676 | - | 915739 | 919263 |  |  |  |  | 93 | 105 | 150 |  |  |
| 8 | Pc.c001504220.Contig2 | 1807 | + | 917972 | 919625 |  |  |  |  |  |  |  |  |  |
| 8 | MALPY03261 | 1749 | - | 919149 | 920920 |  |  |  |  | 93 |  |  |  |  |
| 8 | PcContig270 | 1196 | + | 919583 | 920866 | 34279 | 15176 |  | 920920 |  |  |  |  |  |
| 8 | Pb.c001702806.Contig1 | 4949 | - | 936096 | 941252 |  |  | 936096 |  |  |  |  |  |  |
| 8 | MALPY00665 | 5454 | - | 936137 | 941665 |  |  |  |  |  | 181 |  |  |  |
| 8 | Pc.c000202826.Contig1 | 1689 | + | 936138 | 937827 |  |  |  |  |  |  |  |  |  |
| 8 | Pc.c001404759.Contig1 | 3006 | + | 937941 | 941231 | 5569 | 374 |  | 941665 |  |  |  |  |  |
| 8 | MALPY03238 | 619 | + | 942039 | 942643 | 604 | 635 | 942039 | 942643 |  | 181 | 200 |  |  |
| 8 | MALPY01637 | 7371 | + | 943278 | 950485 |  |  | 943278 |  | 1118 | 181 | 900 |  |  |
| 8 | Pb.c001502393.Contig1 | 6430 | - | 944321 | 950575 |  |  |  |  |  |  |  |  |  |
| 8 | Pc.c001404840.Contig1 | 3309 | + | 947830 | 951139 |  |  |  |  |  |  |  |  |  |
| 8 | MALPY00659 | 14426 | + | 950843 | 964533 |  |  |  |  | 1118 |  |  | PFI1150w | PY02393 |
| 8 | PbContig74 | 13997 | + | 954829 | 969304 |  |  |  |  |  |  |  |  |  |
| 8 | Pc.c001605923.Contig1 | 1218 | + | 956747 | 957965 |  |  |  |  |  |  |  |  |  |
| 8 | Pc.c000002572.Contig1 | 5535 | + | 958359 | 963711 |  |  |  |  |  |  |  |  |  |
| 8 | MALPY00004 | 2552 | - | 965391 | 967809 |  |  |  |  |  | 30 |  |  |  |
| 8 | Pc.c000903298.Contig1 | 2497 | - | 965722 | 968126 | 26026 | 1783 |  | 969304 |  |  |  |  |  |
| 8 | MALPY02304 | 6449 | - | 971087 | 978310 |  |  | 971087 |  |  | 30 | 2500 |  |  |
| 8 | Pb.c001401750.Contig1 | 8901 | + | 971276 | 980840 |  |  |  |  |  |  |  |  |  |
| 8 | Pc.c000602349.Contig1 | 4258 | - | 971613 | 976662 | 9753 | 1603 |  | 980840 |  |  |  |  |  |
| 8 | MALPY01644 | 12793 | + | 982443 | 997422 |  |  | 982443 |  |  | 30 | 4000 | PFI1200w | PY05197 |
| 8 | Pb.c002007663.Contig1 | 981 | + | 982680 | 983814 |  |  |  |  |  |  |  |  |  |
| 8 | Pb.c000101427.Contig1 | 2137 | + | 985008 | 987220 |  |  |  |  |  |  |  |  |  |
| 8 | Pc.c001003717.Contig1 | 2264 | - | 995070 | 997610 | 15167 | 812 |  | 997610 |  |  |  |  |  |
| TK8 | MALPY01703 | 7159 | + | 998422 | 1006307 | 7885 | 314 | 998422 | 1006307 | 56 |  |  |  |  |
| 8 | MALPY02643 | 5016 | - | 1006621 | 1011679 |  |  | 1006621 |  | 56 |  |  |  |  |
| 8 | Pb.c001803819.Contig1 | 1568 | + | 1007946 | 1009544 | 5058 | 1138 |  | 1011679 |  |  |  |  |  |
| 8 | MALPY00249 | 12058 | - | 1012817 | 1025350 |  |  | 1012817 |  | 56 |  |  |  |  |
| 8 | PcContig177 | 7710 | - | 1016517 | 1024894 |  |  |  |  |  |  |  |  |  |
| 8 | PbContig197 | 15036 | - | 1018058 | 1033047 |  |  |  |  |  |  |  |  |  |
| 8 | MALPY01156 | 13190 | - | 1024478 | 1037595 |  |  |  |  | 56 |  |  |  |  |
| 8 | PcContig221 | 6256 | - | 1025035 | 1030996 | 24778 | 1550 |  | 1037595 |  |  |  |  |  |
| 8 | MALPY00206 | 22851 | - | 1039145 | 1061514 |  |  | 1039145 |  | 56 |  |  |  |  |
| 8 | Pb.c001702859.Contig1 | 3396 | - | 1039656 | 1043052 |  |  |  |  |  |  |  |  |  |
| 8 | Pb.c000701493.Contig1 | 2177 | - | 1043769 | 1045940 |  |  |  |  |  |  |  |  |  |
| 8 | Pc.c001505364.Contig1 | 615 | + | 1043850 | 1044465 |  |  |  |  |  |  |  |  |  |
| 8 | PcContig195 | 5083 | + | 1044506 | 1049589 |  |  |  |  |  |  |  |  |  |
| 8 | Pb.c000901463.Contig1 | 7683 | - | 1045629 | 1053312 |  |  |  |  |  |  |  |  |  |
| 8 | MALPY03075 | 510 | - | 1048656 | 1049166 | 22369 | 110 |  | 1061514 |  |  |  |  |  |
| 8 | Pb.c000701442.Contig1 | 17892 | + | 1061624 | 1082527 |  |  | 1061624 |  |  |  |  |  |  |
| 8 | MALPY01319 | 12772 | + | 1063134 | 1076359 |  |  |  |  | 17 |  |  |  |  |
| 8 | Pc.c000703802.Contig1 | 1195 | + | 1065147 | 1066342 |  |  |  |  |  |  |  |  |  |
| 8 | Pc.c000602336.Contig1 | 2197 | + | 1066723 | 1068920 |  |  |  |  |  |  |  |  |  |
| 8 | PcContig520 | 905 | + | 1068965 | 1069870 |  |  |  |  |  |  |  |  |  |
| 8 | Pc.c000002873.Contig1 | 5852 | + | 1070288 | 1076210 |  |  |  |  |  |  |  |  |  |
| 8 | MALPY00072 | 21482 | + | 1077145 | 1099280 |  |  |  |  | 17 |  |  |  |  |
| 8 | Pc.c000603437.Contig1 | 1114 | + | 1078836 | 1079950 |  |  |  |  |  |  |  |  |  |
| 8 | Pb.c001502091.Contig2 | 3544 | + | 1086399 | 1089923 |  |  |  |  |  |  |  |  |  |
| 8 | PcContig110 | 6645 | + | 1087472 | 1094521 |  |  |  |  |  |  |  |  |  |
| 8 | PbContig30 | 5668 | + | 1090147 | 1095788 |  |  |  |  |  |  |  |  |  |
| 8 | Pb.c001001710.Contig1 | 1870 | + | 1096465 | 1098367 |  |  |  |  |  |  |  |  |  |
| 8 | Pc.c000403297.Contig1 | 602 | - | 1097296 | 1097898 |  |  |  |  |  |  |  |  |  |
| 8 | Pc.c000302921.Contig1 | 3523 | - | 1098106 | 1101677 |  |  |  |  |  |  |  |  |  |
| 8 | Pb.c001201676.Contig2 | 6482 | + | 1098573 | 1104879 |  |  |  |  |  |  |  |  |  |
| 8 | MALPY00817 | 12652 | - | 1099294 | 1110856 |  |  |  |  | 17 |  |  |  |  |
| 8 | Pb.c000601575.Contig1 | 2243 | + | 1106640 | 1108840 |  |  |  |  |  |  |  |  |  |
| 8 | Pc.c000002511.Contig1 | 3228 | - | 1106697 | 1109893 | 49232 | 1035 |  | 1110856 |  |  |  |  |  |
| 8 | PcContig317 | 6553 | + | 1111891 | 1119006 |  |  | 1111891 |  |  |  |  |  |  |
| 8 | MALPY01638 | 5812 | + | 1111920 | 1117792 |  |  |  |  | 17 | 167 |  |  |  |
| 8 | Pb.c001602383.Contig1 | 8050 | - | 1112736 | 1121263 |  |  |  |  |  |  |  |  |  |
| 8 | Pc.c000903425.Contig1 | 1919 | + | 1118962 | 1120881 |  |  |  |  |  |  |  |  |  |
| 8 | MALPY03080 | 671 | - | 1120419 | 1121090 | 9372 | 1669 |  | 1121263 |  | 167 | 3000 |  |  |
| 8 | MALPY00126 | 4999 | - | 1122932 | 1128219 |  |  | 1122932 |  |  | 167 | 1400 |  |  |
| 8 | Pb.c000701567.Contig1 | 1601 | + | 1122952 | 1124553 |  |  |  |  |  |  |  |  |  |
| 8 | Pc.c001304243.Contig1 | 1222 | - | 1123746 | 1124968 |  |  |  |  |  |  |  |  |  |
| 8 | PbContig403 | 11889 | + | 1124809 | 1139334 |  |  |  |  |  |  |  |  |  |
| 8 | Pc.c000403327.Contig1 | 1285 | - | 1125424 | 1126712 |  |  |  |  |  |  |  |  |  |
| 8 | MALPY03018 | 668 | + | 1125560 | 1126228 |  |  |  |  |  |  |  |  |  |
| 8 | Pc.c000503515.Contig1 | 711 | - | 1127093 | 1127803 |  |  |  |  |  |  |  |  |  |
| 8 | MALPY03227 | 1159 | - | 1128414 | 1129620 |  |  |  |  | 35 |  |  |  |  |
| 8 | MALPY01796 | 5687 | - | 1129596 | 1137657 |  |  |  |  | 35 |  |  |  |  |
| 8 | MALPY03214 | 299 | + | 1129749 | 1130048 |  |  |  |  |  | 153 |  |  |  |
| 8 | PcContig320 | 3316 | - | 1130657 | 1133988 |  |  |  |  |  |  |  |  |  |
| 8 | Pc.c000303436.Contig1 | 976 | - | 1136556 | 1137532 |  |  |  |  |  |  |  |  |  |
| 8 | MALPY03407 | 1726 | + | 1137191 | 1138917 | 16402 | 1070 |  | 1139334 | 35 | 153 | 5000 |  |  |
| 8 | Pc.c000703473.Contig1 | 4768 | - | 1140404 | 1145151 |  |  | 1140404 |  |  |  |  |  |  |
| 8 | Pb.c000701591.Contig1 | 3956 | + | 1142037 | 1145996 |  |  |  |  |  |  |  |  |  |
| 8 | MALPY01170 | 3751 | + | 1144178 | 1147932 |  |  |  |  |  |  |  |  |  |
| 8 | Pc.c000602871.Contig1 | 2915 | - | 1145482 | 1148397 | 7993 | 2227 |  | 1148397 |  |  |  |  |  |
| 8 | MALPY01250 | 14180 | - | 1150624 | 1164746 |  |  | 1150624 |  |  |  |  |  |  |
| 8 | Pb.c001301829.Contig1 | 4717 | + | 1157640 | 1162342 |  |  |  |  |  |  |  |  |  |
| 8 | Pc.c001203960.Contig1 | 2027 | + | 1160649 | 1162661 | 14122 | 2391 |  | 1164746 |  |  |  |  |  |
| 8 | MALPY01879 | 3217 | + | 1167137 | 1170366 | 3229 | 1715 | 1167137 | 1170366 |  | 219 |  |  |  |
| 8 | MALPY01675 | 14882 | - | 1172081 | 1186878 |  |  | 1172081 |  | 327 | 219 | 1100 |  |  |
| 8 | Pb.c000801728.Contig1 | 4270 | - | 1175450 | 1179720 |  |  |  |  |  |  |  |  |  |
| 8 | Pc.c001003234.Contig1 | 7804 | + | 1177081 | 1185008 |  |  |  |  |  |  |  |  |  |
| 8 | PbContig130 | 6496 | + | 1180424 | 1186559 |  |  |  |  |  |  |  |  |  |
| 8 | Pc.c001304710.Contig1 | 2872 | + | 1185186 | 1188024 |  |  |  |  |  |  |  |  |  |
| 8 | Pb.c001602398.Contig1 | 916 | + | 1186442 | 1187358 |  |  |  |  |  |  |  |  |  |
| 8 | MALPY01292 | 7801 | + | 1186580 | 1195211 |  |  |  |  | 327 |  |  |  |  |
| 8 | PcContig441 | 7872 | + | 1188431 | 1196946 |  |  |  |  |  |  |  |  |  |
| 8 | MALPY02307 | 3856 | - | 1195327 | 1199144 |  |  |  |  |  |  |  |  |  |
| 8 | Pc.c001505406.Contig1 | 1152 | + | 1197136 | 1198270 | 27063 | 7226 |  | 1199144 |  |  |  |  |  |
| 8 | Pc.c000203042.Contig1 | 6230 | + | 1206370 | 1213115 |  |  | 1206370 |  |  |  |  |  |  |
| 8 | MALPY00509 | 6025 | - | 1208398 | 1214988 |  |  |  |  |  |  |  |  |  |
| 8 | Pb.c001101964.Contig1 | 6628 | + | 1208903 | 1216318 |  |  |  |  |  |  |  |  |  |
| 8 | MALPY03250 | 783 | - | 1211000 | 1211783 | 9948 | 738 |  | 1216318 |  | 75 |  |  |  |
| 8 | PbContig256 | 4900 | - | 1217056 | 1221940 |  |  | 1217056 |  |  |  |  |  |  |
| 8 | MALPY00903 | 7482 | + | 1217346 | 1225334 | 8278 | 8988 |  | 1225334 | 330A | 75 | 5000 |  |  |
| 8 | MALPY02081 | 6056 | - | 1234322 | 1240525 |  |  | 1234322 |  |  | 75 | 6000 | PFI1500w | PY06205 |
| 8 | Pb.c001502466.Contig1 | 1767 | + | 1235898 | 1237671 | 6203 | 1656 |  | 1240525 |  |  |  |  |  |
| Centromere | |  |  |  |  |  |  |  |  |  |  |  |  |  |
| 8 | MALPY02415 | 6459 | + | 1242181 | 1248640 |  |  | 1242181 |  | 157A | 75 | 2200 |  |  |
| 8 | Pb.c000301388.Contig1 | 3142 | - | 1246293 | 1249418 |  |  |  |  |  |  |  |  |  |
| 8 | MALPY03452 | 851 | - | 1248534 | 1249382 | 7237 | 251 |  | 1249418 |  | 75 | 1200 |  |  |
| 8 | MALPY02813 | 2792 | - | 1249669 | 1252452 |  |  | 1249669 |  |  | 75 | 750 | PFI1505c | PY07561 |
| 8 | Pc.c000603456.Contig1 | 2411 | + | 1250212 | 1252677 |  |  |  |  |  |  |  |  |  |
| 8 | Pb.c001904396.Contig1 | 1466 | + | 1250352 | 1251839 |  |  |  |  |  |  |  |  |  |
| 8 | MALPY03421 | 292 | + | 1250905 | 1251194 | 3008 | 1640 |  | 1252677 |  |  |  |  |  |
| 8 | MALPY01785 | 2483 | - | 1254317 | 1256803 | 2486 | 4492 | 1254317 | 1256803 |  |  |  | PFI1510w | PY05559 |
| GAP |  |  |  |  |  |  | 3395 | 1258539 | 1261934 |  |  |  | PFI1515w - PFI1520w |  |
| 8 | MALPY02858 | 3635 | - | 1261295 | 1264930 |  |  | 1261295 |  |  |  |  | PFI1525w | PY07648 |
| 8 | Pc.c001813106.Contig1 | 486 | - | 1264093 | 1264579 | 3635 | 3804 |  | 1264930 |  |  |  |  |  |
| 8 | Pc.c001103748.Contig1 | 3121 | + | 1268734 | 1272021 |  |  | 1268734 |  |  |  |  |  |  |
| 8 | Pb.c000701480.Contig1 | 6580 | + | 1269832 | 1276685 |  |  |  |  |  |  |  |  |  |
| 8 | MALPY00917 | 20040 | - | 1269922 | 1291474 |  |  |  |  | 719 |  |  |  |  |
| 8 | Pc.c001405498.Contig1 | 1952 | + | 1272522 | 1274495 |  |  |  |  |  |  |  |  |  |
| 8 | Pc.c000902739.Contig1 | 3895 | - | 1275011 | 1278870 |  |  |  |  |  |  |  |  |  |
| 8 | Pb.c001402069.Contig1 | 1927 | + | 1278059 | 1279992 |  |  |  |  |  |  |  |  |  |
| 8 | Pc.c000102026.Contig2 | 5103 | - | 1279342 | 1285484 |  |  |  |  |  |  |  |  |  |
| 8 | PbContig378 | 3549 | + | 1280062 | 1284680 |  |  |  |  |  |  |  |  |  |
| 8 | Pb.c000201306.Contig2 | 4172 | + | 1285561 | 1289883 |  |  |  |  |  |  |  |  |  |
| 8 | Pc.c000503140.Contig1 | 4203 | + | 1286650 | 1291248 |  |  |  |  |  |  |  |  |  |
| 8 | MALPY03495 | 670 | + | 1289928 | 1290760 |  |  |  |  |  |  |  |  |  |
| 8 | MALPY03584 | 635 | + | 1289936 | 1290733 |  |  |  |  |  |  |  |  |  |
| 8 | Pb.c000701601.Contig1 | 1775 | + | 1289946 | 1291924 |  |  |  |  |  |  |  |  |  |
| 8 | MALPY01061 | 6649 | + | 1291359 | 1298439 | 29705 | 1062 |  | 1298439 | 719 | 4 |  |  |  |
| TK8 | MALPY02669 | 3962 | - | 1299501 | 1304043 |  |  | 1299501 |  | 194 |  |  |  |  |
| 8 | Pc.c001204266.Contig1 | 637 | - | 1303180 | 1303820 |  |  |  |  |  |  |  |  |  |
| 8 | Pc.c001404773.Contig1 | 2244 | - | 1303239 | 1305595 |  |  |  |  |  |  |  |  |  |
| 8 | MALPY01530 | 3125 | - | 1304105 | 1307325 |  |  |  |  | 194 | 4 | 8000 |  |  |
| 8 | Pb.c001602451.Contig1 | 2180 | + | 1307120 | 1309300 |  |  |  |  |  |  |  |  |  |
| 8 | Pc.c000202676.Contig1 | 7194 | + | 1307322 | 1314259 |  |  |  |  |  |  |  |  |  |
| 8 | MALPY00716 | 5193 | - | 1308252 | 1313448 |  |  |  |  | 117A | 4 | 2000 |  |  |
| 8 | Pb.c001803504.Contig1 | 2828 | + | 1309222 | 1312053 |  |  |  |  |  |  |  |  |  |
| TK8 | MALPY02183 | 2939 | + | 1313526 | 1316463 |  |  |  |  | 117A |  |  |  |  |
| man8 | Pb.c000401448.Contig1 | 2451 | + | 1316235 | 1319429 | 19928 | 2269 |  | 1319429 |  |  |  | PFI1525w | PY07648 |
| 8 | Pb.c000301142.Contig2 | 6021 | + | 1321698 | 1328038 |  |  | 1321698 |  |  |  |  |  |  |
| TK8 | MALPY01168 | 3890 | + | 1322554 | 1326191 |  |  |  |  | 38B |  |  |  |  |
| 8 | MALPY00498 | 10714 | - | 1326212 | 1337170 |  |  |  |  | 38B |  |  |  |  |
| 8 | Pc.c001812395.Contig1 | 528 | + | 1326283 | 1326811 |  |  |  |  |  |  |  |  |  |
| 8 | Pc.c000602332.Contig1 | 5878 | + | 1327532 | 1333975 |  |  |  |  |  |  |  |  |  |
| 8 | Pb.c001502043.Contig2 | 10037 | + | 1329277 | 1339326 |  |  |  |  |  |  |  |  |  |
| 8 | MALPY03076 | 256 | - | 1331422 | 1331678 |  |  |  |  |  |  |  |  |  |
| 8 | Pc.c001504186.Contig1 | 6191 | + | 1335431 | 1341815 |  |  |  |  |  |  |  |  |  |
| 8 | MALPY00197 | 9479 | - | 1337162 | 1347030 |  |  |  |  | 38B |  |  |  |  |
| 8 | Pb.c001401779.Contig1 | 4288 | + | 1339644 | 1344550 |  |  |  |  |  |  |  |  |  |
| 8 | PcContig617 | 7067 | + | 1342620 | 1350054 |  |  |  |  |  |  |  |  |  |
| 8 | PbContig270 | 7506 | + | 1344948 | 1352717 |  |  |  |  |  |  |  |  |  |
| 8 | Pc.c000803602.Contig1 | 601 | + | 1346265 | 1346866 |  |  |  |  |  |  |  |  |  |
| 8 | MALPY02032 | 6969 | + | 1346360 | 1353341 |  |  |  |  | 38B |  |  |  |  |
| 8 | Pc.c000102682.Contig1 | 3704 | + | 1350074 | 1353875 | 32177 | 2073 |  | 1353875 |  |  |  |  |  |
| 8 | MALPY01654 | 9839 | - | 1355948 | 1366006 |  |  | 1355948 |  | 38B | 195 |  |  |  |
| 8 | Pc.c000002720.Contig1.2 | 680 | + | 1357901 | 1358581 |  |  |  |  |  |  |  |  |  |
| 8 | Pc.c000602339.Contig2 | 5193 | - | 1360076 | 1365498 |  |  |  |  |  |  |  |  |  |
| 8 | Pb.c001502526.Contig1 | 2354 | + | 1362027 | 1364543 |  |  |  |  |  |  |  |  |  |
| 8 | MALPY03538 | 437 | - | 1362140 | 1362577 |  |  |  |  |  |  |  |  |  |
| 8 | Pb.c001502488.Contig1 | 2803 | - | 1365809 | 1368743 |  |  |  |  |  |  |  |  |  |
| 8 | MALPY00316 | 7513 | + | 1366436 | 1373540 |  |  |  |  |  | 195 | 1400 | PFI1705w | n.a. |
| 8 | Pc.c000903468.Contig1 | 5074 | + | 1367191 | 1372208 |  |  |  |  |  |  |  |  |  |
| 8 | Pb.c000801783.Contig1 | 5352 | + | 1368506 | 1373999 |  |  |  |  |  |  |  |  |  |
| man8 | PbContig4496 | 5551 | - | 1368528 | 1374079 |  |  |  |  |  |  |  |  |  |
| man8 | PcContig6939 | 4956 | + | 1372073 | 1377029 |  |  |  |  |  |  |  |  |  |
| man8 | MALPY02041 | 9929 | + | 1374521 | 1384450 | 28502 |  |  | 1384450 |  |  |  |  |  |
| Telomere | |  |  |  |  |  |  |  |  |  |  |  |  |  |
|  |  |  |  |  |  |  |  |  |  |  |  |  |  |  |
| Unaligned Py contigs grouped with 1 or more contigs aligned along this P. falciparum chromosome | | | | | | | |  |  |  |  |  |  |  |
|  |  |  |  |  |  |  |  |  |  |  |  |  |  |  |
| JC5/8 | MALPY01029 | 7186 |  | PY03539//PY03541 | | 2 putative yir4 protein/hypothetical protein | | | | 117A/B |  |  |  |  |
|  |  |  |  |  |  |  |  |  |  |  |  |  |  |  |
|  |  |  |  |  |  |  |  |  |  |  |  |  |  |  |
